# Supplementary material for: Dissecting the genome-wide genetic variants of milling and appearance quality traits in rice
Source: PubMed Central journal article supplement (PMC6793453; doi:10.1093/jxb/erz256), 2019-05-30
Supplement: erz256_suppl_supplementary_tables_s1-s7.pdf [file erz256_suppl_supplementary_tables_s1-s7.pdf]

Table S1

**Table S1: Accessions used in the study, with the exiting haplotypes for HRY in hotspot regions of chromosome 8 and 11.**

 Favourable haplotype identified for high HRY  
 Missing/heterozygous

| Accession IDs  | chr8 (block1)  | chr11       | Average % HRY |
|----------------|----------------|-------------|---------------|
| IRIS_313-10000 | TTATTATTATATTA | TTGG        | 57.50         |
| IRIS_313-10001 | CCGCCGGCGCCCCG | TTGG        | 35.43         |
| IRIS_313-10007 | TTATTATTATATTA | TTGG        | 46.87         |
| IRIS_313-10016 | CCGCCGGCGCCCCG | TTGG        | 35.10         |
| IRIS_313-10026 | CCGCCGGCGCCCCG | TTGG        | 24.23         |
| IRIS_313-10030 | CCGCCGGCGCCCCG | TTGG        | 14.17         |
| IRIS_313-10034 | CCGCCGGCGCCCCG | TTGG        | 36.40         |
| IRIS_313-10040 | CCGCCGGCGCCCCG | TTGG        | 63.33         |
| IRIS_313-10045 | CCGCCGGCGCCCCG | TTGG        | 28.13         |
| IRIS_313-10046 | CCGCCGGCGCCCCG | TTGG        | 53.37         |
| IRIS_313-10047 | CCGCCGGCGCCCCG | TTGG        | 39.43         |
| IRIS_313-10048 | CCGCCGGCGCCCCG | TTGG        | 32.73         |
| IRIS_313-10050 | CCGCCGGCGCCCCG | TTGG        | 35.73         |
| IRIS_313-10054 | CCGCCGGCGCCCCG | TTGG        | 45.03         |
| IRIS_313-10102 | -              | TTGG        | 41.77         |
| IRIS_313-10103 | CCGCCGGCGCCCCG | TTGG        | 32.97         |
| IRIS_313-10109 | CCGCCGGCGCCCCG | TTGG        | 35.23         |
| IRIS_313-10113 | -              | TTGG        | 53.47         |
| IRIS_313-10114 | CCGCCGGCGCCCCG | TTGG        | 13.07         |
| IRIS_313-10129 | CCGCCGGCGCCCCG | TTGG        | 41.60         |
| IRIS_313-10147 | CCGCCGGCGCCCCG | TTGG        | 43.17         |
| IRIS_313-10148 | CCGCCGGCGCCCCG | TTGG        | 55.00         |
| IRIS_313-10151 | -              | -           | 51.07         |
| IRIS_313-10154 | CCGCCGGCGCCCCG | TTGG        | 43.13         |
| IRIS_313-10167 | CCGCCGGCGCCCCG | TTGG        | 38.93         |
| IRIS_313-10168 | CCGCCGGCGCCCCG | GCAA        | 26.10         |
| IRIS_313-10170 | CCGCCGGCGCCCCG | TTGG        | 36.33         |
| IRIS_313-10171 | CCGCCGGCGCCCCG | TTGG        | 40.93         |
| IRIS_313-10177 | CCGCCGGCGCCCCG | <b>TTGA</b> | 57.40         |
| IRIS_313-10178 | CCGCCGGCGCCCCG | TTGG        | 50.43         |
| IRIS_313-10179 | CCGCCGGCGCCCCG | TTGG        | 52.43         |
| IRIS_313-10191 | TTATTATTATATTA | TTGG        | 59.73         |
| IRIS_313-10220 | -              | TTGG        | 48.90         |
| IRIS_313-10221 | TTATTATTATATTA | TTGG        | 59.13         |
| IRIS_313-10224 | CCGCCGGCGCCCCG | TTGG        | 40.43         |
| IRIS_313-10226 | CCGCCGGCGCCCCG | TTGG        | 45.57         |
| IRIS_313-10234 | TTATTATTATATTA | TTGG        | 42.80         |
| IRIS_313-10235 | CCGCCGGCGCCCCG | TTGG        | 47.90         |
| IRIS_313-10237 | TTATTATTATATTA | TTGG        | 48.67         |
| IRIS_313-10238 | TTATTATTATATTA | TTGG        | 60.97         |
| IRIS_313-10247 | CCGCCGGCGCCCCG | TTGG        | 45.50         |
| IRIS_313-10257 | CCGCCGGCGCCCCG | TTGG        | 30.73         |
| IRIS_313-10260 | CCGCCGGCGCCCCG | TTGG        | 55.20         |
| IRIS_313-10263 | CCGCCGGCGCCCCG | TTGG        | 39.73         |
| IRIS_313-10268 | TTATTATTATATTA | TTGG        | 50.13         |
| IRIS_313-10271 | CCGCCGGCGCCCCG | TTGG        | 48.67         |
| IRIS_313-10274 | -              | TTGG        | 59.43         |

Table S1

| Accession IDs  | chr8 (block1)  | chr11 | Average % HRY |
|----------------|----------------|-------|---------------|
| IRIS_313-10275 | -              | TTGG  | 40.20         |
| IRIS_313-10279 | CCGCCGGCGCCCCG | TTGG  | 30.60         |
| IRIS_313-10285 | -              | TTGG  | 46.90         |
| IRIS_313-10287 | TTATTATTATATTA | TTGG  | 54.07         |
| IRIS_313-10289 | CCGCCGGCGCCCCG | TTGG  | 57.03         |
| IRIS_313-10293 | CCGCCGGCGCCCCG | TTGG  | 46.00         |
| IRIS_313-10294 | CCGCCGGCGCCCCG | TTGG  | 46.40         |
| IRIS_313-10298 | CCGCCGGCGCCCCG | TTGG  | 31.60         |
| IRIS_313-10300 | CCGCCGGCGCCCCG | TTGG  | 53.27         |
| IRIS_313-10301 | CCGCCGGCGCCCCG | TTGG  | 43.73         |
| IRIS_313-10307 | -              | TTGG  | 52.37         |
| IRIS_313-10314 | CCGCCGGCGCCCCG | TTGG  | 48.70         |
| IRIS_313-10318 | CCGCCGGCGCCCCG | TTGG  | 44.70         |
| IRIS_313-10325 | CCGCCGGCGCCCCG | TTGG  | 40.57         |
| IRIS_313-10332 | CCGCCGGCGCCCCG | TTGG  | 58.20         |
| IRIS_313-10333 | CCGCCGGCGCCCCG | TTGG  | 49.47         |
| IRIS_313-10334 | CCGCCGGCGCCCCG | TTGG  | 49.53         |
| IRIS_313-10337 | CCGCCGGCGCCCCG | GCAA  | 33.43         |
| IRIS_313-10340 | TTATTATTATATTA | TTGG  | 50.70         |
| IRIS_313-10349 | CCGCCGGCGCCCCG | GCAA  | 35.50         |
| IRIS_313-10352 | CCGCCGGCGCCCCG | TTGG  | 47.73         |
| IRIS_313-10353 | TTATTATTATATTA | TTGG  | 31.27         |
| IRIS_313-10355 | CCGCCGGCGCCCCG | TTGG  | 37.33         |
| IRIS_313-10357 | CCGCCGGCGCCCCG | TTGG  | 46.37         |
| IRIS_313-10360 | CCGCCGGCGCCCCG | TTGG  | 52.67         |
| IRIS_313-10361 | TTATTATTATATTA | TTGG  | 59.43         |
| IRIS_313-10366 | CCGCCGGCGCCCCG | TTGG  | 48.53         |
| IRIS_313-10371 | CCGCCGGCGCCCCG | TTGG  | 31.70         |
| IRIS_313-10374 | TTATTATTATATTA | TTGG  | 54.50         |
| IRIS_313-10375 | CCGCCGGCGCCCCG | TTGG  | 32.70         |
| IRIS_313-10385 | CCGCCGGCGCCCCG | TTGG  | 38.97         |
| IRIS_313-10392 | TTATTATTATATTA | TTGG  | 46.37         |
| IRIS_313-10394 | CCGCCGGCGCCCCG | TTGG  | 56.80         |
| IRIS_313-10396 | TTATTATTATATTA | TTGG  | 55.67         |
| IRIS_313-10397 | CCGCCGGCGCCCCG | TTGG  | 57.50         |
| IRIS_313-10398 | CCGCCGGCGCCCCG | TTGG  | 59.50         |
| IRIS_313-10399 | CCGCCGGCGCCCCG | TTGG  | 51.80         |
| IRIS_313-10400 | CCGCCGGCGCCCCG | TTGG  | 46.37         |
| IRIS_313-10401 | -              | TTGG  | 50.13         |
| IRIS_313-10402 | CCGCCGGCGCCCCG | TTGG  | 54.43         |
| IRIS_313-10403 | TTATTATTATATTA | TTGG  | 60.50         |
| IRIS_313-10404 | CCGCCGGCGCCCCG | TTGG  | 50.20         |
| IRIS_313-10412 | CCGCCGGCGCCCCG | TTGG  | 49.70         |
| IRIS_313-10417 | CCGCCGGCGCCCCG | TTGG  | 31.30         |
| IRIS_313-10421 | -              | TTGG  | 54.67         |
| IRIS_313-10422 | -              | TTGG  | 35.17         |
| IRIS_313-10423 | CCGCCGGCGCCCCG | GCAA  | 34.67         |
| IRIS_313-8288  | CCGCCGGCGCCCCG | TTGG  | 27.97         |
| IRIS_313-8303  | TTATTATTATATTA | TTGG  | 59.37         |
| IRIS_313-8305  | CCGCCGGCGCCCCG | TTGG  | 49.73         |
| IRIS_313-8315  | CCGCCGGCGCCCCG | TTGG  | 53.60         |
| IRIS_313-8332  | CCGCCGGCGCCCCG | TTGG  | 44.27         |
| IRIS_313-8368  | CCGCCGGCGCCCCG | TTGG  | 32.97         |
| IRIS_313-8380  | CCGCCGGCGCCCCG | TTGG  | 43.10         |

Table S1

| Accession IDs | chr8 (block1)         | chr11 | Average % HRY |
|---------------|-----------------------|-------|---------------|
| IRIS_313-8386 | <b>CCGTTATTATATTA</b> | TTGG  | 51.80         |
| IRIS_313-8392 | CCGCCGGCGCCCCG        | TTGG  | 30.50         |
| IRIS_313-8401 | -                     | TTGG  | 46.90         |
| IRIS_313-8409 | -                     | TTGG  | 57.40         |
| IRIS_313-8412 | -                     | TTGG  | 49.17         |
| IRIS_313-8414 | CCGCCGGCGCCCCG        | TTGG  | 39.83         |
| IRIS_313-8433 | CCGCCGGCGCCCCG        | TTGG  | 52.67         |
| IRIS_313-8435 | CCGCCGGCGCCCCG        | TTGG  | 34.83         |
| IRIS_313-8437 | CCGCCGGCGCCCCG        | TTGG  | 52.83         |
| IRIS_313-8450 | <b>CCGTTATTATATTA</b> | TTGG  | 53.93         |
| IRIS_313-8453 | CCGCCGGCGCCCCG        | TTGG  | 49.83         |
| IRIS_313-8454 | CCGCCGGCGCCCCG        | TTGG  | 52.70         |
| IRIS_313-8458 | CCGCCGGCGCCCCG        | GCAA  | 46.37         |
| IRIS_313-8509 | CCGCCGGCGCCCCG        | -     | 55.10         |
| IRIS_313-8514 | CCGCCGGCGCCCCG        | TTGG  | 44.57         |
| IRIS_313-8530 | CCGCCGGCGCCCCG        | TTGG  | 22.17         |
| IRIS_313-8536 | CCGCCGGCGCCCCG        | TTGG  | 37.60         |
| IRIS_313-8559 | CCGCCGGCGCCCCG        | TTGG  | 49.50         |
| IRIS_313-8568 | CCGCCGGCGCCCCG        | TTGG  | 52.13         |
| IRIS_313-8571 | TTATTATTATATTA        | TTGG  | 57.10         |
| IRIS_313-8585 | TTATTATTATATTA        | TTGG  | 56.57         |
| IRIS_313-8586 | TTATTATTATATTA        | GCAA  | 23.97         |
| IRIS_313-8595 | CCGCCGGCGCCCCG        | TTGG  | 4.37          |
| IRIS_313-8603 | CCGCCGGCGCCCCG        | TTGG  | 46.83         |
| IRIS_313-8614 | <b>CCGTTATTATATTA</b> | TTGG  | 63.13         |
| IRIS_313-8616 | CCGCCGGCGCCCCG        | TTGG  | 47.37         |
| IRIS_313-8621 | -                     | TTGG  | 37.03         |
| IRIS_313-8622 | -                     | TTGG  | 25.37         |
| IRIS_313-8631 | CCGCCGGCGCCCCG        | TTGG  | 32.17         |
| IRIS_313-8632 | CCGCCGGCGCCCCG        | TTGG  | 51.67         |
| IRIS_313-8638 | TTATTATTATATTA        | TTGG  | 44.13         |
| IRIS_313-8643 | CCGCCGGCGCCCCG        | TTGG  | 47.60         |
| IRIS_313-8645 | CCGCCGGCGCCCCG        | TTGG  | 39.23         |
| IRIS_313-8647 | CCGCCGGCGCCCCG        | TTGG  | 58.10         |
| IRIS_313-8659 | CCGCCGGCGCCCCG        | TTGG  | 40.83         |
| IRIS_313-8660 | -                     | TTGG  | 60.73         |
| IRIS_313-8674 | TTATTATTATATTA        | TTGG  | 52.90         |
| IRIS_313-8699 | TTATTATTATATTA        | TTGG  | 58.40         |
| IRIS_313-8704 | CCGCCGGCGCCCCG        | TTGG  | 45.30         |
| IRIS_313-8717 | CCGCCGGCGCCCCG        | TTGG  | 21.73         |
| IRIS_313-8722 | -                     | GCAA  | 36.77         |
| IRIS_313-8725 | CCGCCGGCGCCCCG        | TTGG  | 51.47         |
| IRIS_313-8727 | CCGCCGGCGCCCCG        | TTGG  | 46.23         |
| IRIS_313-8731 | CCGCCGGCGCCCCG        | TTGG  | 56.70         |
| IRIS_313-8732 | CCGCCGGCGCCCCG        | TTGG  | 42.73         |
| IRIS_313-8733 | CCGCCGGCGCCCCG        | TTGG  | 24.77         |
| IRIS_313-8737 | CCGCCGGCGCCCCG        | TTGG  | 29.67         |
| IRIS_313-8743 | CCGCCGGCGCCCCG        | TTGG  | 46.60         |
| IRIS_313-8744 | CCGCCGGCGCCCCG        | TTGG  | 29.47         |
| IRIS_313-8751 | TTATTATTATATTA        | TTGG  | 55.63         |
| IRIS_313-8754 | CCGCCGGCGCCCCG        | TTGG  | 39.13         |
| IRIS_313-8757 | CCGCCGGCGCCCCG        | TTGG  | 45.00         |
| IRIS_313-8781 | CCGCCGGCGCCCCG        | TTGG  | 47.23         |
| IRIS_313-8785 | TTATTATTATATTA        | GCAA  | 36.50         |

Table S1

| Accession IDs | chr8 (block1)         | chr11 | Average % HRY |
|---------------|-----------------------|-------|---------------|
| IRIS_313-8796 | CCGCCGGCGCCCCG        | TTGG  | 55.20         |
| IRIS_313-8812 | CCGCCGGCGCCCCG        | TTGG  | 54.53         |
| IRIS_313-8831 | CCGCCGGCGCCCCG        | TTGG  | 37.73         |
| IRIS_313-8844 | CCGCCGGCGCCCCG        | GCAA  | 37.23         |
| IRIS_313-8846 | CCGCCGGCGCCCCG        | TTGG  | 45.60         |
| IRIS_313-8850 | CCGCCGGCGCCCCG        | TTGG  | 28.70         |
| IRIS_313-8854 | CCGCCGGCGCCCCG        | TTGG  | 50.93         |
| IRIS_313-8889 | TTATTATTATATTA        | TTGG  | 60.73         |
| IRIS_313-8900 | <b>CCGTTATTATATTA</b> | TTGG  | 54.07         |
| IRIS_313-8903 | CCGCCGGCGCCCCG        | TTGG  | 53.00         |
| IRIS_313-8914 | CCGCCGGCGCCCCG        | TTGG  | 40.43         |
| IRIS_313-8920 | -                     | TTGG  | 38.50         |
| IRIS_313-8924 | <b>CCGTTATTATATTA</b> | TTGG  | 48.37         |
| IRIS_313-8925 | CCGCCGGCGCCCCG        | TTGG  | 48.37         |
| IRIS_313-8930 | CCGCCGGCGCCCCG        | TTGG  | 32.63         |
| IRIS_313-8932 | CCGCCGGCGCCCCG        | TTGG  | 61.23         |
| IRIS_313-8935 | CCGCCGGCGCCCCG        | TTGG  | 48.93         |
| IRIS_313-8940 | CCGCCGGCGCCCCG        | TTGG  | 48.13         |
| IRIS_313-8946 | CCGCCGGCGCCCCG        | TTGG  | 58.77         |
| IRIS_313-8956 | CCGCCGGCGCCCCG        | TTGG  | 38.87         |
| IRIS_313-8967 | CCGCCGGCGCCCCG        | TTGG  | 56.50         |
| IRIS_313-8968 | CCGCCGGCGCCCCG        | TTGG  | 43.63         |
| IRIS_313-8980 | TTATTATTATATTA        | GCAA  | 39.07         |
| IRIS_313-8982 | CCGCCGGCGCCCCG        | TTGG  | 40.00         |
| IRIS_313-8986 | CCGCCGGCGCCCCG        | TTGG  | 32.87         |
| IRIS_313-8988 | CCGCCGGCGCCCCG        | TTGG  | 52.07         |
| IRIS_313-8994 | TTATTATTATATTA        | TTGG  | 53.47         |
| IRIS_313-9005 | CCGCCGGCGCCCCG        | TTGG  | 28.23         |
| IRIS_313-9017 | CCGCCGGCGCCCCG        | TTGG  | 29.87         |
| IRIS_313-9023 | CCGCCGGCGCCCCG        | TTGG  | 37.23         |
| IRIS_313-9032 | CCGCCGGCGCCCCG        | TTGG  | 42.20         |
| IRIS_313-9044 | CCGCCGGCGCCCCG        | TTGG  | 30.63         |
| IRIS_313-9065 | CCGCCGGCGCCCCG        | TTGG  | 42.90         |
| IRIS_313-9066 | CCGCCGGCGCCCCG        | TTGG  | 49.37         |
| IRIS_313-9067 | CCGCCGGCGCCCCG        | TTGG  | 22.63         |
| IRIS_313-9072 | <b>CCGTTATTATATTA</b> | TTGG  | 47.40         |
| IRIS_313-9111 | -                     | TTGG  | 55.37         |
| IRIS_313-9119 | TTATTATTATATTA        | TTGG  | 22.70         |
| IRIS_313-9139 | CCGCCGGCGCCCCG        | TTGG  | 44.23         |
| IRIS_313-9148 | CCGCCGGCGCCCCG        | TTGG  | 44.07         |
| IRIS_313-9156 | <b>CCGTTATTATATTA</b> | TTGG  | 53.77         |
| IRIS_313-9174 | CCGCCGGCGCCCCG        | TTGG  | 46.53         |
| IRIS_313-9184 | CCGCCGGCGCCCCG        | TTGG  | 49.50         |
| IRIS_313-9190 | CCGCCGGCGCCCCG        | TTGG  | 54.20         |
| IRIS_313-9198 | -                     | TTGG  | 56.83         |
| IRIS_313-9204 | CCGCCGGCGCCCCG        | TTGG  | 57.57         |
| IRIS_313-9218 | CCGCCGGCGCCCCG        | TTGG  | 31.53         |
| IRIS_313-9227 | CCGCCGGCGCCCCG        | TTGG  | 52.90         |
| IRIS_313-9253 | -                     | TTGG  | 38.03         |
| IRIS_313-9256 | CCGCCGGCGCCCCG        | TTGG  | 28.47         |
| IRIS_313-9259 | CCGCCGGCGCCCCG        | TTGG  | 53.10         |
| IRIS_313-9262 | CCGCCGGCGCCCCG        | TTGG  | 50.93         |
| IRIS_313-9271 | CCGCCGGCGCCCCG        | TTGG  | 43.00         |
| IRIS_313-9281 | CCGCCGGCGCCCCG        | TTGG  | 46.90         |

Table S1

| Accession IDs | chr8 (block1)  | chr11 | Average % HRY |
|---------------|----------------|-------|---------------|
| IRIS_313-9286 | CCGCCGGCGCCCCG | TTGG  | 26.30         |
| IRIS_313-9287 | CCGCCGGCGCCCCG | TTGG  | 37.97         |
| IRIS_313-9313 | CCGCCGGCGCCCCG | TTGG  | 42.13         |
| IRIS_313-9314 | CCGCCGGCGCCCCG | TTGG  | 35.00         |
| IRIS_313-9317 | TTATTATTATATTA | TTGG  | 55.70         |
| IRIS_313-9320 | CCGCCGGCGCCCCG | TTGG  | 41.40         |
| IRIS_313-9324 | CCGCCGGCGCCCCG | TTGG  | 23.50         |
| IRIS_313-9325 | CCGCCGGCGCCCCG | TTGG  | 47.03         |
| IRIS_313-9348 | CCGCCGGCGCCCCG | TTGG  | 44.17         |
| IRIS_313-9351 | CCGCCGGCGCCCCG | TTGG  | 55.00         |
| IRIS_313-9360 | CCGCCGGCGCCCCG | TTGG  | 50.70         |
| IRIS_313-9372 | CCGCCGGCGCCCCG | TTGG  | 40.70         |
| IRIS_313-9384 | CCGCCGGCGCCCCG | TTGG  | 51.37         |
| IRIS_313-9388 | CCGCCGGCGCCCCG | TTGG  | 39.20         |
| IRIS_313-9400 | -              | TTGG  | 43.17         |
| IRIS_313-9403 | CCGCCGGCGCCCCG | TTGG  | 44.77         |
| IRIS_313-9424 | TTATTATTATATTA | TTGG  | 43.43         |
| IRIS_313-9427 | CCGCCGGCGCCCCG | TTGG  | 58.77         |
| IRIS_313-9429 | -              | TTGG  | 58.30         |
| IRIS_313-9433 | CCGCCGGCGCCCCG | TTGG  | 40.33         |
| IRIS_313-9451 | -              | TTGG  | 50.60         |
| IRIS_313-9461 | CCGCCGGCGCCCCG | GCAA  | 42.33         |
| IRIS_313-9469 | CCGCCGGCGCCCCG | TTGG  | 21.77         |
| IRIS_313-9472 | CCGCCGGCGCCCCG | TTGG  | 47.10         |
| IRIS_313-9482 | CCGCCGGCGCCCCG | TTGG  | 38.33         |
| IRIS_313-9484 | CCGCCGGCGCCCCG | TTGG  | 16.93         |
| IRIS_313-9492 | CCGCCGGCGCCCCG | TTGG  | 44.17         |
| IRIS_313-9503 | CCGCCGGCGCCCCG | TTGG  | 27.10         |
| IRIS_313-9505 | CCGCCGGCGCCCCG | TTGG  | 30.90         |
| IRIS_313-9522 | CCGCCGGCGCCCCG | TTGG  | 39.47         |
| IRIS_313-9533 | TTATTATTATATTA | TTGG  | 45.63         |
| IRIS_313-9547 | CCGCCGGCGCCCCG | TTGG  | 55.40         |
| IRIS_313-9551 | CCGCCGGCGCCCCG | TTGG  | 36.97         |
| IRIS_313-9557 | CCGCCGGCGCCCCG | TTGG  | 36.37         |
| IRIS_313-9560 | CCGCCGGCGCCCCG | TTGG  | 52.47         |
| IRIS_313-9566 | -              | TTGG  | 54.97         |
| IRIS_313-9570 | CCGCCGGCGCCCCG | TTGG  | 44.57         |
| IRIS_313-9572 | CCGCCGGCGCCCCG | TTGG  | 33.60         |
| IRIS_313-9574 | CCGCCGGCGCCCCG | TTGG  | 27.93         |
| IRIS_313-9590 | CCGCCGGCGCCCCG | TTGG  | 49.73         |
| IRIS_313-9593 | CCGCCGGCGCCCCG | TTGG  | 59.90         |
| IRIS_313-9594 | CCGCCGGCGCCCCG | TTGG  | 50.90         |
| IRIS_313-9602 | CCGCCGGCGCCCCG | TTGG  | 48.93         |
| IRIS_313-9604 | CCGCCGGCGCCCCG | TTGG  | 52.33         |
| IRIS_313-9605 | CCGCCGGCGCCCCG | TTGG  | 51.77         |
| IRIS_313-9609 | -              | TTGG  | 41.40         |
| IRIS_313-9611 | TTATTATTATATTA | TTGG  | 52.83         |
| IRIS_313-9617 | CCGCCGGCGCCCCG | TTGG  | 21.97         |
| IRIS_313-9623 | CCGCCGGCGCCCCG | TTGG  | 40.93         |
| IRIS_313-9634 | CCGCCGGCGCCCCG | TTGG  | 42.27         |
| IRIS_313-9696 | -              | TTGG  | 57.33         |
| IRIS_313-9705 | CCGCCGGCGCCCCG | TTGG  | 43.13         |
| IRIS_313-9706 | -              | TTGG  | 33.07         |
| IRIS_313-9708 | CCGCCGGCGCCCCG | TTGG  | 29.97         |

Table S1

| Accession IDs | chr8 (block1)  | chr11       | Average % HRY |
|---------------|----------------|-------------|---------------|
| IRIS_313-9723 | CCGCCGGCGCCCCG | TTGG        | 47.27         |
| IRIS_313-9727 | CCGCCGGCGCCCCG | TTGG        | 39.80         |
| IRIS_313-9730 | CCGCCGGCGCCCCG | TTGG        | 54.97         |
| IRIS_313-9732 | CCGCCGGCGCCCCG | TTGG        | 34.67         |
| IRIS_313-9740 | CCGCCGGCGCCCCG | TTGG        | 32.97         |
| IRIS_313-9758 | CCGCCGGCGCCCCG | TTGG        | 52.50         |
| IRIS_313-9767 | CCGCCGGCGCCCCG | TTGG        | 54.73         |
| IRIS_313-9791 | CCGCCGGCGCCCCG | TTGG        | 31.73         |
| IRIS_313-9795 | -              | TTGG        | 42.60         |
| IRIS_313-9831 | CCGCCGGCGCCCCG | GCAG        | 34.03         |
| IRIS_313-9841 | CCGCCGGCGCCCCG | TTGG        | 13.67         |
| IRIS_313-9862 | CCGCCGGCGCCCCG | TTGG        | 25.53         |
| IRIS_313-9867 | CCGCCGGCGCCCCG | TTGG        | 18.47         |
| IRIS_313-9882 | CCGCCGGCGCCCCG | <b>TTGA</b> | 39.87         |
| IRIS_313-9898 | -              | GCAA        | 20.20         |
| IRIS_313-9917 | CCGCCGGCGCCCCG | TTGG        | 50.20         |
| IRIS_313-9922 | CCGCCGGCGCCCCG | TTGG        | 50.50         |
| IRIS_313-9924 | -              | TTGG        | 40.73         |
| IRIS_313-9925 | CCGCCGGCGCCCCG | TTGG        | 53.90         |
| IRIS_313-9940 | CCGCCGGCGCCCCG | TTGG        | 45.57         |
| IRIS_313-9944 | CCGCCGGCGCCCCG | TTGG        | 50.77         |
| IRIS_313-9953 | CCGCCGGCGCCCCG | TTGG        | 51.60         |
| IRIS_313-9966 | CCGCCGGCGCCCCG | TTGG        | 49.13         |

Table S2

**Table S2: Accessions used in the study, with the exiting haplotypes for HRY stability within candidate region on chromosome 8.**

 Favourable haplotype identified for high HRY stability  
 Missing/heterozygous

| Accession IDs  | LOC_Os08g31340 | HRY Stability |
|----------------|----------------|---------------|
| IRIS_313-10000 | CTG            | 1.00          |
| IRIS_313-10001 | CTG            | 0.49          |
| IRIS_313-10007 | CTG            | 0.69          |
| IRIS_313-10016 | CTG            | 0.62          |
| IRIS_313-10026 | CTG            | 0.77          |
| IRIS_313-10030 | CTG            | 0.78          |
| IRIS_313-10034 | CTG            | 0.94          |
| IRIS_313-10040 | CTG            | 1.00          |
| IRIS_313-10045 | CTG            | 0.98          |
| IRIS_313-10046 | CTG            | 0.67          |
| IRIS_313-10047 | CTG            | 0.76          |
| IRIS_313-10048 | CTG            | 0.96          |
| IRIS_313-10050 | CTG            | 0.77          |
| IRIS_313-10054 | CTG            | 0.42          |
| IRIS_313-10102 | CTG            | 0.91          |
| IRIS_313-10103 | CTG            | 1.53          |
| IRIS_313-10109 | CTG            | 0.54          |
| IRIS_313-10113 | CTG            | 0.90          |
| IRIS_313-10114 | CTG            | 0.57          |
| IRIS_313-10129 | CTG            | 0.88          |
| IRIS_313-10147 | CTG            | 0.99          |
| IRIS_313-10148 | CTG            | 0.62          |
| IRIS_313-10151 | CTG            | 0.89          |
| IRIS_313-10154 | -              | 0.79          |
| IRIS_313-10167 | CTG            | 0.68          |
| IRIS_313-10168 | CTG            | 0.82          |
| IRIS_313-10170 | CTG            | 0.92          |
| IRIS_313-10171 | CTG            | 0.68          |
| IRIS_313-10177 | CTG            | 0.67          |
| IRIS_313-10178 | CTG            | 0.80          |
| IRIS_313-10179 | CTG            | 0.78          |
| IRIS_313-10191 | CTG            | 1.06          |
| IRIS_313-10220 | CTG            | 0.59          |
| IRIS_313-10221 | CTG            | 0.99          |
| IRIS_313-10224 | CTG            | 0.76          |
| IRIS_313-10226 | CTC            | 0.82          |
| IRIS_313-10234 | CTG            | 0.30          |
| IRIS_313-10235 | CTG            | 0.64          |
| IRIS_313-10237 | CTG            | 0.35          |
| IRIS_313-10238 | CTG            | 0.63          |
| IRIS_313-10247 | CTG            | 0.34          |
| IRIS_313-10257 | CTG            | 0.93          |
| IRIS_313-10260 | CTG            | 0.63          |
| IRIS_313-10263 | CTG            | 0.45          |
| IRIS_313-10268 | CTG            | 0.58          |
| IRIS_313-10271 | CTG            | 0.52          |
| IRIS_313-10274 | CTG            | 0.83          |

Table S2

| Accession IDs  | LOC_Os08g31340 | HRY Stability |
|----------------|----------------|---------------|
| IRIS_313-10275 | CTG            | 0.53          |
| IRIS_313-10279 | CTG            | 0.33          |
| IRIS_313-10285 | CTG            | 0.53          |
| IRIS_313-10287 | CTG            | 0.83          |
| IRIS_313-10289 | CTG            | 0.62          |
| IRIS_313-10293 | CTG            | 0.67          |
| IRIS_313-10294 | CTG            | 0.57          |
| IRIS_313-10298 | CTG            | 0.49          |
| IRIS_313-10300 | CTC            | 0.72          |
| IRIS_313-10301 | CTG            | 0.74          |
| IRIS_313-10307 | CTG            | 0.71          |
| IRIS_313-10314 | CTG            | 0.41          |
| IRIS_313-10318 | CTG            | 0.61          |
| IRIS_313-10325 | CTG            | 0.89          |
| IRIS_313-10332 | CTG            | 0.80          |
| IRIS_313-10333 | CTG            | 0.65          |
| IRIS_313-10334 | CTG            | 0.81          |
| IRIS_313-10337 | CTG            | 0.66          |
| IRIS_313-10340 | CTG            | 0.54          |
| IRIS_313-10349 | CTG            | 0.54          |
| IRIS_313-10352 | CTG            | 0.52          |
| IRIS_313-10353 | CTG            | 0.38          |
| IRIS_313-10355 | <b>TCC</b>     | 0.82          |
| IRIS_313-10357 | CTG            | 0.61          |
| IRIS_313-10360 | CTG            | 0.87          |
| IRIS_313-10361 | CTG            | 0.74          |
| IRIS_313-10366 | CTG            | 0.60          |
| IRIS_313-10371 | CTG            | 0.51          |
| IRIS_313-10374 | CTG            | 0.82          |
| IRIS_313-10375 | CTG            | 0.47          |
| IRIS_313-10385 | CTG            | 1.05          |
| IRIS_313-10392 | CTG            | 1.08          |
| IRIS_313-10394 | CTG            | 0.61          |
| IRIS_313-10396 | CTG            | 0.78          |
| IRIS_313-10397 | CTG            | 0.84          |
| IRIS_313-10398 | CTG            | 0.87          |
| IRIS_313-10399 | CTG            | 0.92          |
| IRIS_313-10400 | CTG            | 0.69          |
| IRIS_313-10401 | CTG            | 0.75          |
| IRIS_313-10402 | CTG            | 0.88          |
| IRIS_313-10403 | CTG            | 0.71          |
| IRIS_313-10404 | CTG            | 0.51          |
| IRIS_313-10412 | CTG            | 0.64          |
| IRIS_313-10417 | CTG            | 0.44          |
| IRIS_313-10421 | CTG            | 0.53          |
| IRIS_313-10422 | CTG            | 0.87          |
| IRIS_313-10423 | CTG            | 0.53          |
| IRIS_313-8288  | CTG            | 0.44          |
| IRIS_313-8303  | CTG            | 0.61          |
| IRIS_313-8305  | CTG            | 0.80          |
| IRIS_313-8315  | CTG            | 0.46          |
| IRIS_313-8332  | CTG            | 1.01          |
| IRIS_313-8368  | CTG            | 0.59          |



Table S2

| Accession IDs | LOC_Os08g31340 | HRY Stability |
|---------------|----------------|---------------|
| IRIS_313-8380 | CTG            | 0.72          |
| IRIS_313-8386 | CTG            | 0.72          |
| IRIS_313-8392 | CTG            | 0.71          |
| IRIS_313-8401 | CTG            | 0.73          |
| IRIS_313-8409 | CTG            | 0.94          |
| IRIS_313-8412 | CTG            | 0.64          |
| IRIS_313-8414 | CTG            | 0.79          |
| IRIS_313-8433 | CTG            | 0.99          |
| IRIS_313-8435 | CTG            | 0.74          |
| IRIS_313-8437 | CTG            | 0.90          |
| IRIS_313-8450 | CTG            | 0.81          |
| IRIS_313-8453 | <b>TCC</b>     | 0.99          |
| IRIS_313-8454 | CTG            | 0.85          |
| IRIS_313-8458 | CTG            | 0.58          |
| IRIS_313-8509 | CTG            | 0.85          |
| IRIS_313-8514 | CTG            | 0.59          |
| IRIS_313-8530 | CTG            | 0.88          |
| IRIS_313-8536 | CTG            | 0.81          |
| IRIS_313-8559 | CTG            | 0.83          |
| IRIS_313-8568 | CTG            | 0.94          |
| IRIS_313-8571 | CTG            | 0.82          |
| IRIS_313-8585 | CTG            | 0.74          |
| IRIS_313-8586 | CTG            | 0.38          |
| IRIS_313-8595 | CTG            | 1.09          |
| IRIS_313-8603 | CTG            | 0.49          |
| IRIS_313-8614 | CTG            | 1.04          |
| IRIS_313-8616 | CTG            | 0.54          |
| IRIS_313-8621 | CTG            | 0.57          |
| IRIS_313-8622 | CTG            | 0.73          |
| IRIS_313-8631 | CTG            | 0.74          |
| IRIS_313-8632 | CTG            | 1.04          |
| IRIS_313-8638 | CTG            | 0.60          |
| IRIS_313-8643 | CTG            | 0.95          |
| IRIS_313-8645 | CTG            | 1.11          |
| IRIS_313-8647 | CTG            | 0.91          |
| IRIS_313-8659 | CTG            | 1.00          |
| IRIS_313-8660 | CTG            | 0.94          |
| IRIS_313-8674 | CTG            | 0.79          |
| IRIS_313-8699 | CTG            | 0.96          |
| IRIS_313-8704 | CTG            | 0.69          |
| IRIS_313-8717 | <b>TCC</b>     | 1.16          |
| IRIS_313-8722 | CTG            | 0.10          |
| IRIS_313-8725 | CTG            | 0.97          |
| IRIS_313-8727 | CTG            | 0.55          |
| IRIS_313-8731 | CTG            | 0.65          |
| IRIS_313-8732 | CTG            | 0.83          |
| IRIS_313-8733 | <b>TCC</b>     | 1.18          |
| IRIS_313-8737 | <b>TCC</b>     | 1.29          |
| IRIS_313-8743 | CTG            | 0.89          |
| IRIS_313-8744 | CTG            | 1.13          |
| IRIS_313-8751 | CTG            | 0.56          |
| IRIS_313-8754 | CTG            | 0.75          |
| IRIS_313-8757 | CTG            | 0.75          |

Table S2

| Accession IDs | LOC_Os08g31340 | HRY Stability |
|---------------|----------------|---------------|
| IRIS_313-8781 | CTG            | 0.92          |
| IRIS_313-8785 | <b>TCC</b>     | 0.98          |
| IRIS_313-8796 | CTG            | 0.74          |
| IRIS_313-8812 | CTG            | 0.89          |
| IRIS_313-8831 | CTG            | 1.10          |
| IRIS_313-8844 | <b>TCC</b>     | 0.98          |
| IRIS_313-8846 | CTG            | 0.86          |
| IRIS_313-8850 | CTG            | 1.10          |
| IRIS_313-8854 | CTG            | 0.78          |
| IRIS_313-8889 | CTG            | 0.88          |
| IRIS_313-8900 | CTG            | 0.92          |
| IRIS_313-8903 | CTG            | 0.74          |
| IRIS_313-8914 | CTG            | 0.84          |
| IRIS_313-8920 | <b>TCC</b>     | 1.18          |
| IRIS_313-8924 | CTG            | 0.74          |
| IRIS_313-8925 | <b>TCC</b>     | 1.04          |
| IRIS_313-8930 | CTG            | 0.63          |
| IRIS_313-8932 | CTG            | 0.84          |
| IRIS_313-8935 | CTG            | 0.82          |
| IRIS_313-8940 | CTG            | 0.96          |
| IRIS_313-8946 | CTG            | 0.76          |
| IRIS_313-8956 | CTG            | 1.24          |
| IRIS_313-8967 | CTG            | 0.68          |
| IRIS_313-8968 | CTG            | 0.99          |
| IRIS_313-8980 | CTG            | 0.43          |
| IRIS_313-8982 | CTG            | 0.84          |
| IRIS_313-8986 | CTG            | 0.78          |
| IRIS_313-8988 | CTG            | 0.58          |
| IRIS_313-8994 | CTG            | 0.80          |
| IRIS_313-9005 | CTG            | 0.62          |
| IRIS_313-9017 | CTG            | 0.55          |
| IRIS_313-9023 | CTG            | 0.52          |
| IRIS_313-9032 | -              | 0.83          |
| IRIS_313-9044 | CTG            | 0.71          |
| IRIS_313-9065 | -              | 1.09          |
| IRIS_313-9066 | CTG            | 0.99          |
| IRIS_313-9067 | <b>TCC</b>     | 0.96          |
| IRIS_313-9072 | CTG            | 0.88          |
| IRIS_313-9111 | CTG            | 0.97          |
| IRIS_313-9119 | CTG            | 0.91          |
| IRIS_313-9139 | CTG            | 0.91          |
| IRIS_313-9148 | CTG            | 0.73          |
| IRIS_313-9156 | CTG            | 0.78          |
| IRIS_313-9174 | CTG            | 0.93          |
| IRIS_313-9184 | CTG            | 0.90          |
| IRIS_313-9190 | <b>TCC</b>     | 0.73          |
| IRIS_313-9198 | <b>TCC</b>     | 0.87          |
| IRIS_313-9204 | CTG            | 0.91          |
| IRIS_313-9218 | <b>TCC</b>     | 0.95          |
| IRIS_313-9227 | CTG            | 0.49          |
| IRIS_313-9253 | CTG            | 0.76          |
| IRIS_313-9256 | CTG            | 0.67          |
| IRIS_313-9259 | CTC            | 0.70          |

Table S2

| Accession IDs | LOC_Os08g31340 | HRY Stability |
|---------------|----------------|---------------|
| IRIS_313-9262 | CTG            | 0.56          |
| IRIS_313-9271 | CTG            | 0.71          |
| IRIS_313-9281 | CTG            | 0.70          |
| IRIS_313-9286 | CTG            | 0.75          |
| IRIS_313-9287 | CTG            | 0.55          |
| IRIS_313-9313 | CTG            | 0.71          |
| IRIS_313-9314 | CTG            | 0.90          |
| IRIS_313-9317 | CTG            | 0.94          |
| IRIS_313-9320 | CTG            | 0.70          |
| IRIS_313-9324 | CTG            | 0.77          |
| IRIS_313-9325 | CTG            | 0.61          |
| IRIS_313-9348 | CTG            | 0.66          |
| IRIS_313-9351 | CTG            | 0.68          |
| IRIS_313-9360 | <b>TCC</b>     | 0.78          |
| IRIS_313-9372 | CTG            | 0.73          |
| IRIS_313-9384 | CTG            | 1.11          |
| IRIS_313-9388 | CTG            | 0.90          |
| IRIS_313-9400 | CTG            | 0.56          |
| IRIS_313-9403 | <b>TCC</b>     | 0.99          |
| IRIS_313-9424 | CTG            | 0.88          |
| IRIS_313-9427 | CTG            | 0.69          |
| IRIS_313-9429 | CTG            | 0.90          |
| IRIS_313-9433 | CTG            | 0.86          |
| IRIS_313-9451 | CTG            | 0.84          |
| IRIS_313-9461 | CTG            | 0.92          |
| IRIS_313-9469 | CTG            | 0.85          |
| IRIS_313-9472 | CTG            | 0.58          |
| IRIS_313-9482 | CTG            | 0.62          |
| IRIS_313-9484 | CTG            | 0.39          |
| IRIS_313-9492 | CTG            | 0.75          |
| IRIS_313-9503 | -              | 0.45          |
| IRIS_313-9505 | CTG            | 0.77          |
| IRIS_313-9522 | CTG            | 0.85          |
| IRIS_313-9533 | CTG            | 0.73          |
| IRIS_313-9547 | CTG            | 0.92          |
| IRIS_313-9551 | CTG            | 0.90          |
| IRIS_313-9557 | CTG            | 1.15          |
| IRIS_313-9560 | CTG            | 0.68          |
| IRIS_313-9566 | CTG            | 0.76          |
| IRIS_313-9570 | CTG            | 0.83          |
| IRIS_313-9572 | CTG            | 0.91          |
| IRIS_313-9574 | <b>TCC</b>     | 1.40          |
| IRIS_313-9590 | CTG            | 0.98          |
| IRIS_313-9593 | CTG            | 0.70          |
| IRIS_313-9594 | CTG            | 0.88          |
| IRIS_313-9602 | CTG            | 0.85          |
| IRIS_313-9604 | CTG            | 0.79          |
| IRIS_313-9605 | CTG            | 0.89          |
| IRIS_313-9609 | <b>TCC</b>     | 0.99          |
| IRIS_313-9611 | CTG            | 0.75          |
| IRIS_313-9617 | <b>TCC</b>     | 1.30          |
| IRIS_313-9623 | CTG            | 0.72          |
| IRIS_313-9634 | CTC            | 0.39          |

Table S2

| Accession IDs | LOC_Os08g31340 | HRY Stability |
|---------------|----------------|---------------|
| IRIS_313-9696 | CTG            | 0.95          |
| IRIS_313-9705 | CTG            | 0.87          |
| IRIS_313-9706 | CTG            | 0.90          |
| IRIS_313-9708 | CTG            | 0.48          |
| IRIS_313-9723 | CTG            | 1.03          |
| IRIS_313-9727 | CTG            | 0.91          |
| IRIS_313-9730 | CTG            | 0.70          |
| IRIS_313-9732 | CTG            | 0.65          |
| IRIS_313-9740 | CTG            | 0.60          |
| IRIS_313-9758 | CTG            | 0.93          |
| IRIS_313-9767 | CTG            | 0.89          |
| IRIS_313-9791 | CTG            | 0.55          |
| IRIS_313-9795 | CTG            | 0.61          |
| IRIS_313-9831 | CTG            | 1.12          |
| IRIS_313-9841 | CTG            | 0.72          |
| IRIS_313-9862 | CTG            | 1.13          |
| IRIS_313-9867 | CTG            | 0.83          |
| IRIS_313-9882 | CTG            | 0.81          |
| IRIS_313-9898 | -              | 0.46          |
| IRIS_313-9917 | CTG            | 0.86          |
| IRIS_313-9922 | CTG            | 0.85          |
| IRIS_313-9924 | CTG            | 0.70          |
| IRIS_313-9925 | CTG            | 0.81          |
| IRIS_313-9940 | CTG            | 0.49          |
| IRIS_313-9944 | CTG            | 0.85          |
| IRIS_313-9953 | CTG            | 0.50          |
| IRIS_313-9966 | CTG            | 0.30          |

Table S3

**Table S3: Single locus GWAS for SNPs detected against Nipponbare reference genome with corresponding orthologous IDs in ZS97 and MH63.**

| Position | Chr | Ref | Alt | Beta  | -log10 p-value | Region     | Gene                                       | Function of the Gene                      | Orthologous_ZS97              | Orthologues_MH63              |
|----------|-----|-----|-----|-------|----------------|------------|--------------------------------------------|-------------------------------------------|-------------------------------|-------------------------------|
| 5117290  | 5   | T   | C   | 0.29  | 4.95           | Upstream   | LOC_Os05g09160                             | Unknown                                   | Not Present                   | MH05g0088700                  |
| 5237830  | 5   | A   | G   | 0.35  | 7.14           | Upstream   | LOC_Os05g09360                             | Unknown                                   | ZS05g0108900                  | MH05g0091600                  |
| 5299051  | 5   | A   | G   | 0.30  | 5.43           | Upstream   | LOC_Os05g09450                             | Unknown                                   | Not present                   | Not present                   |
| 5357676  | 5   | C   | A   | -0.44 | 11.81          | Upstream   | LOC_Os05g09510                             | Unknown                                   | ZS05g0109900                  | MH05g0092800                  |
| 5358236  | 5   | G   | C   | -0.42 | 9.89           | Intergenic | LOC_Os05g09510,<br>LOC_Os05g09520<br>(GW5) | Unknown,<br>Signalling calcium            | ZS05g0109900,<br>ZS05g0110000 | MH05g0092800,<br>MH05g0093000 |
| 5359283  | 5   | G   | A   | -0.39 | 10.26          | Intergenic | LOC_Os05g09510,<br>LOC_Os05g09520<br>(GW5) | Unknown,<br>Signalling calcium            | ZS05g0109900,<br>ZS05g0110000 | MH05g0092800,<br>MH05g0093000 |
| 5359520  | 5   | G   | A   | -0.48 | 14.45          | Intergenic | LOC_Os05g09510,<br>LOC_Os05g09520          | Unknown,<br>Signalling calcium            | ZS05g0109900,<br>ZS05g0110000 | MH05g0092800,<br>MH05g0093000 |
| 5361195  | 5   | A   | T   | -0.37 | 9.83           | Upstream   | LOC_Os05g09520                             | Signalling calcium                        | ZS05g0110000                  | MH05g0093000                  |
| 5361276  | 5   | T   | C   | -0.49 | 15.04          | Upstream   | LOC_Os05g09520                             | Signalling calcium                        | ZS05g0110000                  | MH05g0093000                  |
| 5363611  | 5   | A   | G   | -0.42 | 12.26          | Upstream   | LOC_Os05g09520                             | Signalling calcium                        | ZS05g0110000                  | MH05g0093000                  |
| 5368403  | 5   | A   | G   | -0.34 | 8.61           | Downstream | LOC_Os05g09520                             | Signalling calcium                        | ZS05g0110000                  | MH05g0093000                  |
| 5369802  | 5   | A   | G   | -0.42 | 11.82          | Downstream | LOC_Os05g09520                             | Signalling calcium                        | ZS05g0110000                  | MH05g0093000                  |
| 5373379  | 5   | G   | A   | -0.38 | 10.21          | Intergenic | LOC_Os05g09520,<br>LOC_Os05g09530          | Signalling calcium,<br>Aspartate protease | ZS05g0110000-<br>ZS05g0110100 | MH05g0093000,<br>MH05g0093100 |
| 5374961  | 5   | C   | T   | -0.34 | 8.19           | Intergenic | LOC_Os05g09520,<br>LOC_Os05g09530          | Signalling calcium,<br>Aspartate protease | ZS05g0110000-<br>ZS05g0110100 | MH05g0093000,<br>MH05g0093100 |
| 5377012  | 5   | A   | G   | -0.28 | 5.73           | Intergenic | LOC_Os05g09520,<br>LOC_Os05g09530          | Signalling calcium,<br>Aspartate protease | ZS05g0110000-<br>ZS05g0110100 | MH05g0093000,<br>MH05g0093100 |
| 5377744  | 5   | T   | A   | -0.27 | 5.55           | Intergenic | LOC_Os05g09520,<br>LOC_Os05g09530          | Signalling calcium,<br>Aspartate protease | ZS05g0110000-<br>ZS05g0110100 | MH05g0093000,<br>MH05g0093100 |
| 5378981  | 5   | A   | T   | -0.37 | 9.01           | Downstream | LOC_Os05g09520,<br>LOC_Os05g09530          | Signalling calcium,<br>Aspartate protease | ZS05g0110000-<br>ZS05g0110100 | MH05g0093000,<br>MH05g0093100 |
| 5433386  | 5   | T   | C   | 0.30  | 6.91           | Downstream | LOC_Os05g09620                             | Unknown                                   | ZS05g0110700                  | MH05g0094000                  |

Table S4

**Table S4 : Accessions used in the study, with the exiting haplotypes for lowering chalk in hotspot regions of chromosome 5.**

**■ Favourable haplotype identified for lowering chalk**  
**■ Missing/heterozygous**

| Accession IDs  | New_gene               | LOC_Os05g09520 | LOC_Os05g09530               | PGC   |
|----------------|------------------------|----------------|------------------------------|-------|
| IRIS_313-10000 | ATATGCTAAGAGCTA        | GCTAGG         | TGGTCTGTATTCGTTGGAA          | 60.30 |
| IRIS_313-10001 | GCTCAAAGGAGATCG        | ATCGTT         | TGGGTCTGTATTCGTTGGAA         | 3.95  |
| IRIS_313-10007 | ATATGCTAAGAGCTA        | GCTAGG         | TGGTCTGTATTCGTTGGAA          | 92.75 |
| IRIS_313-10016 | GCTCAAAGGAGATCG        | ATCGTT         | TGGGTCTGTATTCGTTGGAA         | 7.18  |
| IRIS_313-10026 | -                      | -              | <b>TGGGTCTGTGTTTCGTTGGAA</b> | 30.98 |
| IRIS_313-10030 | ATATGCTAAGAGCTA        | GCTAGG         | CAAGCTCAGGACAACTAGG          | 84.87 |
| IRIS_313-10034 | ATATGCTAAGAGCTA        | -              | TGGGTCTGTATTCGTTGGAA         | 2.73  |
| IRIS_313-10040 | ATATGCTAAGAGCTA        | GCTAGG         | CAAGCTCAGGACAACTAGG          | 2.78  |
| IRIS_313-10045 | GCTCAAAGGAGATCG        | ATCGTT         | TGGGTCTGTATTCGTTGGAA         | 7.28  |
| IRIS_313-10046 | GCTCAAAGGAGATCG        | ATCGTT         | TGGGTCTGTATTCGTTGGAA         | 4.47  |
| IRIS_313-10047 | -                      | GCTAGG         | CAAGCTCAGGACAACTAGG          | 10.03 |
| IRIS_313-10048 | GCTCAAAGGAGATCG        | ATCGTT         | TGGGTCTGTATTCGTTGGAA         | 9.29  |
| IRIS_313-10050 | ATATGCTAAGAGCTA        | GCTAGG         | -                            | 16.56 |
| IRIS_313-10054 | GCTCAAAGGAGATCG        | ATCGTT         | TGGGTCTGTATTCGTTGGAA         | 4.61  |
| IRIS_313-10077 | GCTCAAAGGAGATCG        | ATCGTT         | TGGGTCTGTATTCGTTGGAA         | 7.99  |
| IRIS_313-10102 | <b>GCTCGCTGGGGGCCG</b> | <b>GCCGGT</b>  | <b>TGGGTCTGTGTTTCGTTGGAA</b> | 7.40  |
| IRIS_313-10103 | GCTCAAAGGAGATCG        | ATCGTT         | TGGGTCTGTATTCGTTGGAA         | 68.30 |
| IRIS_313-10109 | GCTCAAAGGAGATCG        | ATCGTT         | TGGGTCTGTATTCGTTGGAA         | 8.38  |
| IRIS_313-10113 | -                      | ATCGTT         | TGGGTCTGTATTCGTTGGAA         | 3.02  |
| IRIS_313-10114 | GCTCAAAGGAGATCG        | ATCGTT         | TGGGTCTGTATTCGTTGGAA         | 42.66 |
| IRIS_313-10129 | ATATGCTAAGAGCTA        | GCTAGG         | CAAGCTCAGGACAACTAGG          | 30.79 |
| IRIS_313-10147 | -                      | GCTAGG         | TGGTCTGTATTCGTTGGAA          | 1.38  |
| IRIS_313-10148 | ATATGCTAAGAGCTA        | GCTAGG         | CAAGCTCAGGACAACTAGG          | 6.99  |
| IRIS_313-10151 | GCTCAAAGGAGATCG        | GCTAGG         | TGGTCTGTATTCGTTGGAA          | 0.89  |
| IRIS_313-10154 | ATATGCTAAGAGCTA        | GCTAGG         | TGGTCTGTATTCGTTGGAA          | 28.10 |
| IRIS_313-10167 | GCTCAAAGGAGATCG        | ATCGTT         | TGGGTCTGTATTCGTTGGAA         | 2.36  |
| IRIS_313-10168 | ATATGCTAAGAGCTA        | GCTAGG         | TGGTCTGTATTCGTTGGAA          | 58.20 |
| IRIS_313-10170 | -                      | -              | TGGTCTGTATTCGTTGGAA          | 39.75 |
| IRIS_313-10171 | ATATGCTAAGAGCTA        | GCTAGG         | TGGTCTGTATTCGTTGGAA          | 35.57 |
| IRIS_313-10177 | ATATGCTAAGAGCTA        | GCTAGG         | CAAGCTCAGGACAACTAGG          | 12.94 |
| IRIS_313-10178 | ATATGCTAAGAGCTA        | GCTAGG         | -                            | 7.70  |
| IRIS_313-10179 | ATATGCTAAGAGCTA        | GCTAGG         | TGGGTCTGTATTCGTTGGAA         | 9.54  |
| IRIS_313-10191 | GCTCAAAGGAGATCG        | ATCGTT         | TGGGTCTGTATTCGTTGGAA         | 0.17  |
| IRIS_313-10220 | <b>GCTCGCTGGGGGCCG</b> | <b>GCCGGT</b>  | <b>TGGGTCTGTGTTTCGTTGGAA</b> | 4.36  |
| IRIS_313-10221 | ATATGCTAAGAGCTA        | GCTAGG         | TGGGTCTGTATTCGTTGGAA         | 9.33  |
| IRIS_313-10224 | -                      | -              | <b>TGGGTCTGTGTTTCGTTGGAA</b> | 21.80 |
| IRIS_313-10226 | ATATGCTAAGAGCTA        | GCTAGG         | -                            | 42.54 |
| IRIS_313-10234 | ATATGCTAAGAGCTA        | GCTAGG         | TGGTCTGTATTCGTTGGAA          | 21.53 |
| IRIS_313-10235 | GCTCAAAGGAGATCG        | ATCGTT         | TGGGTCTGTATTCGTTGGAA         | 4.72  |
| IRIS_313-10237 | GCTCAAAGGAGATCG        | ATCGTT         | TGGGTCTGTATTCGTTGGAA         | 2.55  |
| IRIS_313-10238 | GCTCAAAGGAGATCG        | ATCGTT         | TGGGTCTGTATTCGTTGGAA         | 0.94  |
| IRIS_313-10247 | GCTCAAAGGAGATCG        | ATCGTT         | TGGGTCTGTATTCGTTGGAA         | 0.87  |
| IRIS_313-10257 | GCTCAAAGGAGATCG        | ATCGTT         | -                            | 6.49  |
| IRIS_313-10260 | <b>GCTCGCTGGGGGCCG</b> | <b>GCCGGT</b>  | <b>TGGGTCTGTGTTTCGTTGGAA</b> | 6.47  |
| IRIS_313-10263 | -                      | <b>GCCGGT</b>  | -                            | 2.61  |
| IRIS_313-10268 | -                      | <b>GCCGGT</b>  | <b>TGGGTCTGTGTTTCGTTGGAA</b> | 5.86  |
| IRIS_313-10271 | <b>GCTCGCTGGGGGCCG</b> | <b>GCCGGT</b>  | -                            | 7.45  |
| IRIS_313-10274 | -                      | -              | -                            | 1.22  |

Table S4

| Accession IDs  | New_gene               | LOC_Os05g09520 | LOC_Os05g09530               | PGC   |
|----------------|------------------------|----------------|------------------------------|-------|
| IRIS_313-10275 | <b>GCTCGCTGGGGGCCG</b> | <b>GCCGGT</b>  | <b>TGGGTCTGTGTTTCGTTGGAA</b> | 8.67  |
| IRIS_313-10279 | GCTCAAAGGAGAGCTA       | GCTAGG         | TGGTCTGTATTCGTTGGAA          | 6.67  |
| IRIS_313-10285 | GCTCAAAGGAGATCG        | ATCGTT         | TGGGTCTGTATTCGTTGGAA         | 4.59  |
| IRIS_313-10287 | GCTCAAAGGAGATCG        | ATCGTT         | TGGGTCTGTATTCGTTGGAA         | 4.75  |
| IRIS_313-10289 | GCTCAAAGGAGATCG        | ATCGTT         | TGGGTCTGTATTCGTTGGAA         | 3.95  |
| IRIS_313-10293 | GCTCAAAGGAGATCG        | ATCGTT         | TGGGTCTGTATTCGTTGGAA         | 0.91  |
| IRIS_313-10294 | GCTCAAAGGAGATCG        | ATCGTT         | TGGGTCTGTATTCGTTGGAA         | 1.15  |
| IRIS_313-10298 | GCTCAAAGGAGATCG        | ATCGTT         | TGGGTCTGTATTCGTTGGAA         | 12.73 |
| IRIS_313-10300 | GCTCAAAGGAGATCG        | ATCGTT         | TGGGTCTGTATTCGTTGGAA         | 2.69  |
| IRIS_313-10301 | GCTCAAAGGAGATCG        | ATCGTT         | TGGGTCTGTATTCGTTGGAA         | 11.13 |
| IRIS_313-10307 | GCTCAAAGGAGATCG        | ATCGTT         | TGGGTCTGTATTCGTTGGAA         | 6.77  |
| IRIS_313-10314 | -                      | <b>GCCGGT</b>  | <b>TGGGTCTGTGTTTCGTTGGAA</b> | 2.25  |
| IRIS_313-10318 | GCTCAAAGGAGATCG        | ATCGTT         | TGGGTCTGTATTCGTTGGAA         | 3.80  |
| IRIS_313-10325 | <b>GCTCGCTGGGGGCCG</b> | <b>GCCGGT</b>  | <b>TGGGTCTGTGTTTCGTTGGAA</b> | 3.40  |
| IRIS_313-10332 | GCTCAAAGGAGATCG        | ATCGTT         | TGGGTCTGTATTCGTTGGAA         | 1.83  |
| IRIS_313-10333 | ATATGCTAAGAGCTA        | GCTAGG         | TGGTCTGTATTCGTTGGAA          | 22.76 |
| IRIS_313-10334 | ATATGCTAAGAGCTA        | GCTAGG         | -                            | 13.75 |
| IRIS_313-10337 | ATATGCTAAGAGCTA        | GCTAGG         | TGGGTCTGTATTCGTTGGAA         | 42.29 |
| IRIS_313-10340 | GCTCAAAGGAGATCG        | ATCGTT         | TGGGTCTGTATTCGTTGGAA         | 10.84 |
| IRIS_313-10349 | GCTCAAAGGAGATCG        | ATCGTT         | TGGGTCTGTATTCGTTGGAA         | 7.61  |
| IRIS_313-10352 | <b>GCTCGCTGGGGGCCG</b> | <b>GCCGGT</b>  | <b>TGGGTCTGTGTTTCGTTGGAA</b> | 4.86  |
| IRIS_313-10353 | ATATGCTAAGAGCTA        | GCTAGG         | CAAGCTCACGACAACTAGG          | 92.38 |
| IRIS_313-10355 | GCTCAAAGGAGATCG        | ATCGTT         | TGGGTCTGTATTCGTTGGAA         | 9.22  |
| IRIS_313-10357 | GCTCAAAGGAGATCG        | ATCGTT         | TGGGTCTGTATTCGTTGGAA         | 3.54  |
| IRIS_313-10359 | -                      | -              | <b>TGGGTCTGTGTTTCGTTGGAA</b> | 16.02 |
| IRIS_313-10360 | GCTCAAAGGAGATCG        | ATCGTT         | TGGGTCTGTATTCGTTGGAA         | 1.54  |
| IRIS_313-10361 | ATATGCTAAGAGCTA        | GCTAGG         | CAAGCTCACGACAACTAGG          | 30.73 |
| IRIS_313-10366 | -                      | -              | TGGGTCTGTATTCGTTGGAA         | 1.23  |
| IRIS_313-10371 | GCTCAAAGGAGATCG        | ATCGTT         | TGGGTCTGTATTCGTTGGAA         | 5.48  |
| IRIS_313-10374 | GCTCAAAGGAGATCG        | ATCGTT         | TGGGTCTGTATTCGTTGGAA         | 4.75  |
| IRIS_313-10375 | ATATGCTAAGAGCTA        | GCTAGG         | CAAGCCCACGACAACTAGG          | 29.99 |
| IRIS_313-10385 | -                      | ATCGTT         | TGGGTCTGTATTCGTTGGAA         | 1.33  |
| IRIS_313-10392 | GCTCAAAGGAGATCG        | ATCGTT         | TGGGTCTGTATTCGTTGGAA         | 3.83  |
| IRIS_313-10394 | GCTCAAAGGAGATCG        | ATCGTT         | TGGGTCTGTATTCGTTGGAA         | 9.40  |
| IRIS_313-10396 | GCTCAAAGGAGATCG        | ATCGTT         | TGGGTCTGTATTCGTTGGAA         | 2.38  |
| IRIS_313-10397 | GCTCAAAGGAGATCG        | ATCGTT         | TGGGTCTGTATTCGTTGGAA         | 0.43  |
| IRIS_313-10398 | GCTCAAAGGAGATCG        | ATCGTT         | TGGGTCTGTATTCGTTGGAA         | 0.83  |
| IRIS_313-10399 | -                      | GCTAGG         | TGGTCTGTATTCGTTGGAA          | 3.88  |
| IRIS_313-10400 | GCTCAAAGGAGATCG        | ATCGTT         | TGGGTCTGTATTCGTTGGAA         | 0.61  |
| IRIS_313-10401 | -                      | ATCGTT         | TGGGTCTGTATTCGTTGGAA         | 2.97  |
| IRIS_313-10402 | GCTCAAAGGAGATCG        | ATCGTT         | TGGGTCTGTATTCGTTGGAA         | 3.03  |
| IRIS_313-10403 | GCTCAAAGGAGATCG        | ATCGTT         | TGGGTCTGTATTCGTTGGAA         | 0.14  |
| IRIS_313-10404 | ATATGCTAAGAGCTA        | -              | <b>TGGGTCTGTGTTTCGTTGGAA</b> | 9.65  |
| IRIS_313-10412 | -                      | -              | TGGTCTGTATTCGTTGGAA          | 15.54 |
| IRIS_313-10417 | -                      | GCTAGG         | CAAGCTCACGACAACTAGG          | 26.98 |
| IRIS_313-10421 | ATATGCTAAGAGCTA        | GCTAGG         | TGGGTCTGTATTCGTTGGAA         | 10.29 |
| IRIS_313-10422 | -                      | -              | -                            | 22.84 |
| IRIS_313-10423 | ATATGCTAAGAGCTA        | GCTAGG         | CAAGCTCACGACAACTAGG          | 26.69 |
| IRIS_313-11437 | GCTCAAAGGAGATCG        | ATCGTT         | TGGGTCTGTATTCGTTGGAA         | 5.01  |
| IRIS_313-11467 | GCTCAAAGGAGATCG        | ATCGTT         | TGGGTCTGTATTCGTTGGAA         | 1.17  |
| IRIS_313-11478 | GCTCAAAGGAGATCG        | ATCGTT         | TGGGTCTGTATTCGTTGGAA         | 18.58 |
| IRIS_313-11487 | -                      | -              | TGGGTCTGTATTCGTTGGAA         | 4.40  |
| IRIS_313-11508 | GCTCAAAGGAGATCG        | ATCGTT         | TGGGTCTGTATTCGTTGGAA         | 1.02  |
| IRIS_313-11570 | -                      | GCTAGG         | TGGTCTGTATTCGTTGGAA          | 50.43 |

Table S4

| Accession IDs  | New_gene        | LOC_Os05g09520 | LOC_Os05g09530       | PGC   |
|----------------|-----------------|----------------|----------------------|-------|
| IRIS_313-11573 | -               | ATCGTT         | TGGGTCTGTATTCGTTGGAA | 22.91 |
| IRIS_313-11577 | -               | ATCGTT         | TGGGTCTGTATTCGTTGGAA | 19.46 |
| IRIS_313-11580 | GCTCAAAGGAGATCG | ATCGTT         | TGGGTCTGTATTCGTTGGAA | 0.08  |
| IRIS_313-11585 | ATTTGCTAAGAGCTA | GCTAGG         | CAAGCTCAGGACAACTAGG  | 25.96 |
| IRIS_313-11609 | GCTCAAAGGAGATCG | -              | TGGGTCTGTATTCGTTGGAA | 9.21  |
| IRIS_313-11650 | GCTCAAAGGAGATCG | ATCGTT         | TGGGTCTGTATTCGTTGGAA | 5.33  |
| IRIS_313-11671 | GCTCAAAGGAGATCG | ATCGTT         | TGGGTCTGTATTCGTTGGAA | 4.68  |
| IRIS_313-11724 | ATATGCTAAGAGCTA | GCTAGG         | CAAGCTCAGGACAACTAGG  | 22.66 |
| IRIS_313-11747 | GCTCAAAGGAGATCG | ATCGTT         | TGGGTCTGTATTCGTTGGAA | 1.19  |
| IRIS_313-11802 | -               | ATCGTT         | TGGGTCTGTATTCGTTGGAA | 29.04 |
| IRIS_313-11828 | ATATGCTAAGAGCTA | GCTAGG         | CAAGCTCAGGACAACTAGG  | 5.26  |
| IRIS_313-7688  | GCTCAAAGGAGATCG | ATCGTT         | TGGGTCTGTATTCGTTGGAA | 0.58  |
| IRIS_313-7719  | GCTCAAAGGAGATCG | ATCGTT         | TGGGTCTGTATTCGTTGGAA | 1.14  |
| IRIS_313-7725  | GCTCAAAGGAGATCG | ATCGTT         | TGGGTCTGTATTCGTTGGAA | 3.55  |
| IRIS_313-8068  | GCTCAAAGGAGATCG | ATCGTT         | -                    | 6.34  |
| IRIS_313-8069  | GCTCAAAGGAGATCG | ATCGTT         | TGGGTCTGTATTCGTTGGAA | 2.25  |
| IRIS_313-8161  | GCTCAAAGGAGATCG | ATCGTT         | -                    | 12.78 |
| IRIS_313-8288  | GCTCAAAGGAGATCG | ATCGTT         | TGGGTCTGTATTCGTTGGAA | 52.33 |
| IRIS_313-8303  | GCTCAAAGGAGATCG | ATCGTT         | TGGGTCTGTATTCGTTGGAA | 2.56  |
| IRIS_313-8305  | GCTCAAAGGAGATCG | ATCGTT         | TGGGTCTGTATTCGTTGGAA | 16.18 |
| IRIS_313-8315  | GCTCAAAGGAGATCG | ATCGTT         | TGGGTCTGTATTCGTTGGAA | 40.78 |
| IRIS_313-8332  | GCTCAAAGGAGATCG | ATCGTT         | TGGGTCTGTATTCGTTGGAA | 28.17 |
| IRIS_313-8368  | GCTCAAAGGAGATCG | ATCGTT         | -                    | 29.35 |
| IRIS_313-8380  | ATATGCTAAGAGCTA | GCTAGG         | CAAGCTCAGGACAACTAGG  | 84.21 |
| IRIS_313-8383  | -               | -              | -                    | 43.08 |
| IRIS_313-8386  | ATATGCTAAGAGCTA | GCTAGG         | TGGGTCTGTATTCGTTGGAA | 6.39  |
| IRIS_313-8392  | GCTCAAAGGAGATCG | ATCGTT         | TGGGTCTGTATTCGTTGGAA | 12.67 |
| IRIS_313-8401  | -               | -              | -                    | 63.93 |
| IRIS_313-8405  | ATATGCTAAGAGCTA | GCTAGG         | CAAGCTCAGGACAACTAGG  | 36.46 |
| IRIS_313-8409  | -               | ATCGTT         | TGGGTCTGTATTCGTTGGAA | 7.58  |
| IRIS_313-8412  | GCTCAAAGGAGATCG | ATCGTT         | -                    | 8.00  |
| IRIS_313-8414  | GCTCAAAGGAGATCG | ATCGTT         | TGGGTCTGTATTCGTTGGAA | 17.89 |
| IRIS_313-8433  | ATATGCTAAGAGCTA | GCTAGG         | -                    | 17.77 |
| IRIS_313-8435  | ATATGCTAAGAGCTA | GCTAGG         | CAAGCTCAGGACAACTAGG  | 51.63 |
| IRIS_313-8437  | ATATGCTAAGAGCTA | GCTAGG         | CAAGCCCAGGACAACTAGG  | 84.48 |
| IRIS_313-8450  | GCTCAAAGGAGATCG | ATCGTT         | TGGGTCTGTATTCGTTGGAA | 4.43  |
| IRIS_313-8453  | ATATGCTAAGAGCTA | GCTAGG         | TGGGTCTGTATTCGTTGGAA | 14.98 |
| IRIS_313-8454  | ATATGCTAAGAGCTA | GCTAGG         | TGGTCTGTATTCGTTGGAA  | 8.48  |
| IRIS_313-8458  | GCTCAAAGGAGATCG | ATCGTT         | TGGGTCTGTATTCGTTGGAA | 6.71  |
| IRIS_313-8509  | -               | ATCGTT         | TGGGTCTGTATTCGTTGGAA | 2.37  |
| IRIS_313-8514  | ATATGCTAAGAGCTA | GCTAGG         | CAAGCTCAGGACAACTAGG  | 20.98 |
| IRIS_313-8530  | ATATGCTAAGAGCTA | GCTAGG         | CAAGCCCAGGACAACTAGG  | 46.36 |
| IRIS_313-8536  | GCTCAAAGGAGATCG | ATCGTT         | TGGGTCTGTATTCGTTGGAA | 9.37  |
| IRIS_313-8559  | -               | GCTAGG         | CAAGCTCAGGACAACTAGG  | 8.72  |
| IRIS_313-8568  | GCTCAAAGGAGATCG | ATCGTT         | TGGGTCTGTATTCGTTGGAA | 21.02 |
| IRIS_313-8571  | -               | -              | TGGGTCTGTATTCGTTGGAA | 3.88  |
| IRIS_313-8585  | -               | -              | TGGGTCTGTATTCGTTGGAA | 40.12 |
| IRIS_313-8586  | ATATGCTAAGAGCTA | GCTAGG         | TGGGTCTGTATTCGTTGGAA | 87.75 |
| IRIS_313-8595  | GCTCAAAGGAGATCG | ATCGTT         | TGGGTCTGTATTCGTTGGAA | 75.83 |
| IRIS_313-8603  | ATATGCTAAGAGCTA | GCTAGG         | TGGTCTGTATTCGTTGGAA  | 93.84 |
| IRIS_313-8614  | GCTCAAAGGAGATCG | ATCGTT         | TGGGTCTGTATTCGTTGGAA | 0.58  |
| IRIS_313-8616  | GCTCAAAGGAGATCG | ATCGTT         | TGGGTCTGTATTCGTTGGAA | 1.05  |
| IRIS_313-8621  | -               | ATCGTT         | TGGGTCTGTATTCGTTGGAA | 16.71 |
| IRIS_313-8622  | ATTTGCTAAGAGCTA | GCTAGG         | TGGGTCTGTATTCGTTGGAA | 40.04 |



Table S4

| Accession IDs | New_gene               | LOC_Os05g09520 | LOC_Os05g09530            | PGC   |
|---------------|------------------------|----------------|---------------------------|-------|
| IRIS_313-8631 | ATATGCTAAGAGCTA        | GCTAGG         | CAAGCTCACGACAACTAGG       | 13.44 |
| IRIS_313-8632 | GCTCAAAGGAGATCG        | ATCGTT         | TGGGTCTGTATTCGTTGGAA      | 35.79 |
| IRIS_313-8638 | ATATGCTAAGAGCTA        | GCTAGG         | TGGTTCTGTATTCGTTGGAA      | 92.82 |
| IRIS_313-8643 | ATATGCTAAGAGCTA        | GCTAGG         | CAAGCTCACGACAACTAGG       | 2.67  |
| IRIS_313-8645 | ATATGCTAAGAGCTA        | GCTAGG         | CAAGCTCACGACAACTAGG       | 34.17 |
| IRIS_313-8647 | -                      | -              | -                         | 6.21  |
| IRIS_313-8659 | ATATGCTAAGAGCTA        | GCTAGG         | TGGGTCTGTATTCGTTGGAA      | 39.73 |
| IRIS_313-8660 | -                      | ATCGTT         | TGGGTCTGTATTCGTTGGAA      | 10.65 |
| IRIS_313-8674 | GCTCAAAGGAGATCG        | ATCGTT         | TGGGTCTGTATTCGTTGGAA      | 0.82  |
| IRIS_313-8697 | -                      | ATCGTT         | TGGGTCTGTATTCGTTGGAA      | 0.71  |
| IRIS_313-8699 | ATATGCTAAGAGCTA        | GCTAGG         | <b>TGGGTCTGTTCGTTGGAA</b> | 12.43 |
| IRIS_313-8704 | -                      | -              | -                         | 5.31  |
| IRIS_313-8717 | ATATGCTAAGAGCTA        | GCTAGG         | TGGGTCTGTATTCGTTGGAA      | 47.75 |
| IRIS_313-8722 | ATATGCTAAGAGCTA        | GCTAGG         | TGGTTCTGTATTCGTTGGAA      | 87.13 |
| IRIS_313-8725 | GCTCAAAGGAGATCG        | ATCGTT         | TGGGTCTGTATTCGTTGGAA      | 52.53 |
| IRIS_313-8727 | ATATGCTAAGAGCTA        | -              | -                         | 17.42 |
| IRIS_313-8731 | ATATGCTAAGAGCTA        | GCTAGG         | CAAGCTCACGACAACTAGG       | 22.60 |
| IRIS_313-8732 | GCTCAAAGGAGATCG        | ATCGTT         | TGGGTCTGTATTCGTTGGAA      | 3.76  |
| IRIS_313-8733 | ATATGCTAAGAGCTA        | GCTAGG         | CAAGCCCACGACAACTAGG       | 24.39 |
| IRIS_313-8737 | GCTCAAAGGAGATCG        | ATCGTT         | <b>TGGGTCTGTTCGTTGGAA</b> | 24.38 |
| IRIS_313-8743 | ATATGCTAAGAGCTA        | GCTAGG         | CAAGCTCACGACAACTAGG       | 33.54 |
| IRIS_313-8744 | ATATGCTAAGAGCTA        | GCTAGG         | TGGGTCTGTATTCGTTGGAA      | 54.46 |
| IRIS_313-8751 | GCTCAAAGGAGATCG        | ATCGTT         | TGGGTCTGTATTCGTTGGAA      | 2.32  |
| IRIS_313-8754 | ATATGCTAAGAGCTA        | GCTAGG         | CAAGCTCACGACAACTAGG       | 35.63 |
| IRIS_313-8757 | ATATGCTAAGAGCTA        | -              | TGGGTCTGTATTCGTTGGAA      | 31.68 |
| IRIS_313-8781 | GCTCAAAGGAGATCG        | ATCGTT         | TGGGTCTGTATTCGTTGGAA      | 5.20  |
| IRIS_313-8785 | GCTCAAAGAGAGCTA        | GCTAGG         | TGGTTCTGTATTCGTTGGAA      | 3.67  |
| IRIS_313-8796 | GCTCAAAGGAGATCG        | ATCGTT         | TGGGTCTGTATTCGTTGGAA      | 4.13  |
| IRIS_313-8812 | ATATGCTAAGAGCTA        | GCTAGG         | CAAGCTCACGACAACTAGG       | 41.84 |
| IRIS_313-8831 | -                      | GCTAGG         | CAAGCTCACGACAACTAGG       | 17.93 |
| IRIS_313-8844 | -                      | ATCGTT         | TGGGTCTGTATTCGTTGGAA      | 15.66 |
| IRIS_313-8846 | ATATGCTAAGAGCTA        | GCTAGG         | -                         | 41.54 |
| IRIS_313-8850 | -                      | GCTAGG         | TGGGTCTGTATTCGTTGGAA      | 37.35 |
| IRIS_313-8854 | -                      | ATCGTT         | -                         | 21.55 |
| IRIS_313-8889 | -                      | -              | CAAGCTCACGACAACTAGG       | 9.61  |
| IRIS_313-8900 | GCTCAAAGGAGATCG        | ATCGTT         | TGGGTCTGTATTCGTTGGAA      | 9.42  |
| IRIS_313-8903 | GCTCAAAGGAGATCG        | ATCGTT         | -                         | 8.00  |
| IRIS_313-8914 | ATATGCTAAGAGCTA        | GCTAGG         | TGGTTCTGTATTCGTTGGAA      | 7.98  |
| IRIS_313-8920 | <b>GCTCAAAGGAGATCG</b> | ATCGTT         | TGGGTCTGTATTCGTTGGAA      | 3.85  |
| IRIS_313-8924 | ATATGCTAAGAGCTA        | GCTAGG         | CAAGCTCACGACAACTAGG       | 10.06 |
| IRIS_313-8925 | ATATGCTAAGAGCTA        | GCTAGG         | CAAGCCCACGACAACTAGG       | 42.54 |
| IRIS_313-8930 | ATATGCTAAGAGCTA        | GCTAGG         | CAAGCCCACGACAACTAGG       | 53.00 |
| IRIS_313-8932 | GCTCAAAGGAGATCG        | ATCGTT         | TGGGTCTGTATTCGTTGGAA      | 2.30  |
| IRIS_313-8935 | GCTCAAAGGAGATCG        | ATCGTT         | TGGGTCTGTATTCGTTGGAA      | 2.68  |
| IRIS_313-8940 | ATATGCTAAGAGCTA        | GCTAGG         | TGGTTCTGTATTCGTTGGAA      | 28.46 |
| IRIS_313-8946 | ATATGCTAAGAGCTA        | GCTAGG         | TGGTTCTGTATTCGTTGGAA      | 78.73 |
| IRIS_313-8948 | ATATGCTAAGAGCTA        | GCTAGG         | TGGTTCTGTATTCGTTGGAA      | 4.91  |
| IRIS_313-8956 | <b>GCTCGCTGGGGCCG</b>  | <b>GCCGGT</b>  | -                         | 7.02  |
| IRIS_313-8967 | -                      | ATCGTT         | TGGGTCTGTATTCGTTGGAA      | 30.13 |
| IRIS_313-8968 | ATATGCTAAGAGCTA        | GCTAGG         | CAAGCTCACGACAACTAGG       | 29.56 |
| IRIS_313-8980 | ATATGCTAAGAGCTA        | GCTAGG         | TGGTTCTGTATTCGTTGGAA      | 90.52 |
| IRIS_313-8982 | GCTCAAAGGAGATCG        | ATCGTT         | -                         | 9.44  |
| IRIS_313-8986 | -                      | -              | <b>TGGGTCTGTTCGTTGGAA</b> | 12.38 |
| IRIS_313-8987 | GCTCAAAGGAGATCG        | ATCGTT         | TGGGTCTGTATTCGTTGGAA      | 2.58  |

Table S4

| Accession IDs | New_gene         | LOC_Os05g09520 | LOC_Os05g09530            | PGC    |
|---------------|------------------|----------------|---------------------------|--------|
| IRIS_313-8988 | GCTCAAAGGAGATCG  | ATCGTT         | TGGGTCTGTATTCGTTGGAA      | 1.98   |
| IRIS_313-8994 | GCTCAAAGGAGATCG  | ATCGTT         | TGGGTCTGTATTCGTTGGAA      | 60.56  |
| IRIS_313-9005 | ATATGCTAAGAGCTA  | GCTAGG         | TGGGTCTGTATTCGTTGGAA      | 33.83  |
| IRIS_313-9017 | ATATGCTAAGAGCTA  | GCTAGG         | TGGTCTGTATTCGTTGGAA       | 48.05  |
| IRIS_313-9023 | ATATGCTAAGAGCTA  | GCTAGG         | <b>TGGGTCTGTTCGTTGGAA</b> | 6.91   |
| IRIS_313-9032 | GCTCAAAGGAGATCG  | ATCGTT         | TGGGTCTGTATTCGTTGGAA      | 2.18   |
| IRIS_313-9044 | GCTCAAAGGAGATCG  | ATCGTT         | TGGGTCTGTATTCGTTGGAA      | 1.78   |
| IRIS_313-9065 | ATATGCTAAGAGCTA  | GCTAGG         | -                         | 27.12  |
| IRIS_313-9066 | GCTCAAAGGAGATCG  | ATCGTT         | TGGGTCTGTATTCGTTGGAA      | 1.47   |
| IRIS_313-9067 | GCTCAAAGGAGATCG  | ATCGTT         | TGGGTCTGTATTCGTTGGAA      | 39.85  |
| IRIS_313-9072 | GCTCAAAGGAGATCG  | ATCGTT         | TGGGTCTGTATTCGTTGGAA      | 5.39   |
| IRIS_313-9111 | GCTCAAAGGAGATCG  | ATCGTT         | TGGGTCTGTATTCGTTGGAA      | 1.18   |
| IRIS_313-9119 | GCTCAAAGGAGATCG  | ATCGTT         | -                         | 3.02   |
| IRIS_313-9139 | GCTCAAAGGAGATCG  | ATCGTT         | TGGGTCTGTATTCGTTGGAA      | 3.52   |
| IRIS_313-9148 | ATATGCTAAGAGCTA  | GCTAGG         | CAAGCCCACGACAAACTAGG      | 22.56  |
| IRIS_313-9156 | GCTCAAAGGAGATCG  | ATCGTT         | TGGGTCTGTATTCGTTGGAA      | 6.33   |
| IRIS_313-9174 | -                | ATCGTT         | TGGGTCTGTATTCGTTGGAA      | 43.79  |
| IRIS_313-9184 | ATATGCTAAGAGCTA  | GCTAGG         | CAAGCTCACGACAAACTAGG      | 10.28  |
| IRIS_313-9187 | -                | -              | -                         | 22.56  |
| IRIS_313-9190 | -                | -              | CAAGCTCACGACAAACTAGG      | 0.59   |
| IRIS_313-9197 | ATATGCTAAGAGCTA  | GCTAGG         | -                         | 65.23  |
| IRIS_313-9198 | GCTCAAAGGAGATCG  | ATCGTT         | TGGGTCTGTATTCGTTGGAA      | 81.53  |
| IRIS_313-9204 | ATATGCTAAGAGCTA  | -              | TGGTCTGTATTCGTTGGAA       | 17.19  |
| IRIS_313-9218 | -                | ATCGTT         | -                         | 22.12  |
| IRIS_313-9227 | GCTCAAAGGAGATCG  | ATCGTT         | TGGGTCTGTATTCGTTGGAA      | 4.51   |
| IRIS_313-9253 | ATTTGCTAAGAGCTA  | GCTAGG         | CAAGCTCACGACAAACTAGG      | 41.75  |
| IRIS_313-9256 | -                | GCTAGG         | CAAGCCCACGACAAACTAGG      | 35.09  |
| IRIS_313-9259 | GCTCAAAGGAGATCG  | -              | TGGGTCTGTATTCGTTGGAA      | 7.33   |
| IRIS_313-9262 | GCTCAAAGGAGATCG  | ATCGTT         | TGGGTCTGTATTCGTTGGAA      | 7.47   |
| IRIS_313-9271 | GCTCAAAGGAGATCG  | ATCGTT         | -                         | 5.74   |
| IRIS_313-9281 | ATATGCTAAGAGCTA  | GCTAGG         | TGGTCTGTATTCGTTGGAA       | 18.29  |
| IRIS_313-9285 | ATATGCTAAGAGCTA  | GCTAGG         | -                         | 21.72  |
| IRIS_313-9286 | GCTCAAAGGAGAGCTA | GCTAGG         | TGGTCTGTATTCGTTGGAA       | 2.86   |
| IRIS_313-9287 | GCTCAAAGGAGATCG  | ATCGTT         | TGGGTCTGTATTCGTTGGAA      | 40.83  |
| IRIS_313-9288 | GCTCAAAGGAGATCG  | ATCGTT         | TGGGTCTGTATTCGTTGGAA      | 8.18   |
| IRIS_313-9313 | GCTCAAAGGAGATCG  | ATCGTT         | TGGGTCTGTATTCGTTGGAA      | 18.58  |
| IRIS_313-9314 | GCTCAAAGGAGATCG  | ATCGTT         | TGGGTCTGTATTCGTTGGAA      | 28.95  |
| IRIS_313-9317 | ATATGCTAAGAGCTA  | -              | TGGGTCTGTATTCGTTGGAA      | 8.11   |
| IRIS_313-9320 | ATATGCTAAGAGCTA  | GCTAGG         | -                         | 100.00 |
| IRIS_313-9324 | ATATGCTAAGAGCTA  | GCTAGG         | TGGTCTGTATTCGTTGGAA       | 53.88  |
| IRIS_313-9325 | GCTCAAAGGAGATCG  | ATCGTT         | TGGGTCTGTATTCGTTGGAA      | 13.53  |
| IRIS_313-9348 | GCTCAAAGGAGATCG  | ATCGTT         | TGGGTCTGTATTCGTTGGAA      | 1.57   |
| IRIS_313-9351 | -                | ATCGTT         | TGGGTCTGTATTCGTTGGAA      | 23.12  |
| IRIS_313-9360 | GCTCAAAGGAGATCG  | ATCGTT         | TGGGTCTGTATTCGTTGGAA      | 2.71   |
| IRIS_313-9372 | ATATGCTAAGAGCTA  | GCTAGG         | TGGTCTGTATTCGTTGGAA       | 25.13  |
| IRIS_313-9384 | GCTCAAAGGAGATCG  | ATCGTT         | -                         | 0.51   |
| IRIS_313-9388 | ATATGCTAAGAGCTA  | GCTAGG         | CAAGCTCACGACAAACTAGG      | 40.26  |
| IRIS_313-9400 | GCTCAAAGGAGATCG  | ATCGTT         | -                         | 17.30  |
| IRIS_313-9403 | GCTCAAAGGAGATCG  | ATCGTT         | TGGGTCTGTATTCGTTGGAA      | 2.50   |
| IRIS_313-9424 | ATATGCTAAGAGCTA  | GCTAGG         | TGGTCTGTATTCGTTGGAA       | 15.62  |
| IRIS_313-9427 | GCTCAAAGGAGATCG  | ATCGTT         | TGGGTCTGTATTCGTTGGAA      | 41.50  |
| IRIS_313-9429 | -                | ATCGTT         | TGGGTCTGTATTCGTTGGAA      | 7.20   |
| IRIS_313-9433 | -                | ATCGTT         | TGGGTCTGTATTCGTTGGAA      | 51.43  |
| IRIS_313-9451 | GCTCAAAGGAGAGCTA | GCTAGG         | TGGTCTGTATTCGTTGGAA       | 14.68  |

Table S4

| Accession IDs | New_gene               | LOC_Os05g09520 | LOC_Os05g09530               | PGC   |
|---------------|------------------------|----------------|------------------------------|-------|
| IRIS_313-9461 | -                      | ATCGTT         | TGGGTCTGTATTCGTTGGAA         | 0.45  |
| IRIS_313-9469 | ATTTGCTAAGAGCTA        | GCTAGG         | CAAGCTCAGGACAACTAGG          | 63.79 |
| IRIS_313-9472 | -                      | -              | -                            | 13.82 |
| IRIS_313-9482 | GCTCAAAGGAGATCG        | ATCGTT         | TGGGTCTGTATTCGTTGGAA         | 2.60  |
| IRIS_313-9484 | GCTCAAAGGAGATCG        | ATCGTT         | TGGGTCTGTATTCGTTGGAA         | 6.45  |
| IRIS_313-9492 | GCTCAAAGGAGATCG        | ATCGTT         | TGGGTCTGTATTCGTTGGAA         | 37.36 |
| IRIS_313-9503 | GCTCAAAGGAGATCG        | ATCGTT         | TGGGTCTGTATTCGTTGGAA         | 8.36  |
| IRIS_313-9505 | GCTCAAAGGAGATCG        | ATCGTT         | TGGGTCTGTATTCGTTGGAA         | 7.65  |
| IRIS_313-9522 | ATATGCTAAGAGCTA        | GCTAGG         | CAAGCTCAGGACAACTAGG          | 36.93 |
| IRIS_313-9533 | -                      | ATCGTT         | TGGGTCTGTATTCGTTGGAA         | 1.81  |
| IRIS_313-9547 | GCTCAAAGGAGATCG        | ATCGTT         | TGGGTCTGTATTCGTTGGAA         | 22.84 |
| IRIS_313-9551 | GCTCAAAGGAGATCG        | ATCGTT         | TGGGTCTGTATTCGTTGGAA         | 6.56  |
| IRIS_313-9557 | ATATGCTAAGAGCTA        | GCTAGG         | TGGGTCTGTATTCGTTGGAA         | 28.36 |
| IRIS_313-9560 | ATATGCTAAGAGCTA        | GCTAGG         | -                            | 40.11 |
| IRIS_313-9566 | GCTCAAAGGAGATCG        | ATCGTT         | TGGGTCTGTATTCGTTGGAA         | 4.89  |
| IRIS_313-9570 | GCTCAAAGGAGATCG        | ATCGTT         | TGGGTCTGTATTCGTTGGAA         | 1.45  |
| IRIS_313-9572 | GCTCAAAGGAGATCG        | ATCGTT         | TGGGTCTGTATTCGTTGGAA         | 15.25 |
| IRIS_313-9574 | GCTCAAAGGAGATCG        | ATCGTT         | TGGGTCTGTATTCGTTGGAA         | 3.35  |
| IRIS_313-9590 | GCTCAAAGGAGATCG        | ATCGTT         | TGGGTCTGTATTCGTTGGAA         | 53.99 |
| IRIS_313-9593 | GCTCAAAGGAGATCG        | ATCGTT         | TGGGTCTGTATTCGTTGGAA         | 29.40 |
| IRIS_313-9594 | ATATGCTAAGAGCTA        | GCTAGG         | CAAGCCCAGGACAACTAGG          | 89.99 |
| IRIS_313-9602 | GCTCAAAGGAGATCG        | ATCGTT         | TGGGTCTGTATTCGTTGGAA         | 2.56  |
| IRIS_313-9604 | GCTCAAAGGAGATCG        | ATCGTT         | TGGGTCTGTATTCGTTGGAA         | 2.91  |
| IRIS_313-9605 | ATATGCTAAGAGCTA        | GCTAGG         | CAAGCTCAGGACAACTAGG          | 8.44  |
| IRIS_313-9609 | ATATGCTAAGAGCTA        | GCTAGG         | TGGTCTGTATTCGTTGGAA          | 8.04  |
| IRIS_313-9611 | -                      | -              | CAAGCTCAGGACAACTAGG          | 4.30  |
| IRIS_313-9617 | ATATGCTAAGAGCTA        | GCTAGG         | TGGGTCTGTATTCGTTGGAA         | 68.45 |
| IRIS_313-9623 | GCTCAAAGGAGATCG        | ATCGTT         | -                            | 4.22  |
| IRIS_313-9634 | GCTCAAAGGAGATCG        | ATCGTT         | TGGGTCTGTATTCGTTGGAA         | 76.20 |
| IRIS_313-9696 | GCTCAAAGGAGATCG        | ATCGTT         | TGGGTCTGTATTCGTTGGAA         | 1.05  |
| IRIS_313-9705 | ATTTGCTAAGAGCTA        | GCTAGG         | -                            | 18.71 |
| IRIS_313-9706 | ATTTGCTAAGAGCTA        | GCTAGG         | CAAGCTCAGGACAACTAGG          | 14.98 |
| IRIS_313-9708 | ATATGCTAAGAGCTA        | GCTAGG         | CAAGCTCAGGACAACTAGG          | 4.31  |
| IRIS_313-9723 | ATATGCTAAGAGCTA        | GCTAGG         | CAAGCTCAGGACAACTAGG          | 38.42 |
| IRIS_313-9727 | ATATGCTAAGAGCTA        | GCTAGG         | TGGTCTGTATTCGTTGGAA          | 37.02 |
| IRIS_313-9730 | ATATGCTAAGAGCTA        | GCTAGG         | CAAGCTCAGGACAACTAGG          | 26.77 |
| IRIS_313-9732 | -                      | -              | -                            | 8.08  |
| IRIS_313-9740 | GCTCAAAGGAGATCG        | ATCGTT         | -                            | 48.03 |
| IRIS_313-9758 | ATTTGCTAAGAGCTA        | GCTAGG         | CAAGCCCAGGACAACTAGG          | 19.15 |
| IRIS_313-9767 | -                      | <b>GCCGGT</b>  | <b>TGGGTCTGTGTTTCGTTGGAA</b> | 9.09  |
| IRIS_313-9791 | -                      | GCTAGG         | -                            | 34.96 |
| IRIS_313-9795 | GCTCAAAGGAGATCG        | ATCGTT         | CAAGCCCAGGACAACTAGG          | 9.49  |
| IRIS_313-9831 | ATATGCTAAGAGCTA        | GCTAGG         | -                            | 34.49 |
| IRIS_313-9841 | GCTCAAAGGAGATCG        | ATCGTT         | TGGGTCTGTATTCGTTGGAA         | 2.32  |
| IRIS_313-9862 | ATATGCTAAGAGCTA        | GCTAGG         | CAAGCTCAGGACAACTAGG          | 69.82 |
| IRIS_313-9867 | ATATGCTAAGAGCTA        | GCTAGG         | TGGTCTGTATTCGTTGGAA          | 67.46 |
| IRIS_313-9882 | ATATGCTAAGAGCTA        | GCTAGG         | CAAGCTCAGGACAACTAGG          | 88.94 |
| IRIS_313-9898 | GCTCAAAGGAGATCG        | -              | TGGTCTGTATTCGTTGGAA          | 11.28 |
| IRIS_313-9917 | ATATGCTAAGAGCTA        | GCTAGG         | TGGTCTGTATTCGTTGGAA          | 9.71  |
| IRIS_313-9922 | GCTCAAAGGAGATCG        | ATCGTT         | CAAGCCCAGGACAACTAGG          | 5.62  |
| IRIS_313-9924 | ATATGCTAAGAGCTA        | GCTAGG         | TGGTCTGTATTCGTTGGAA          | 15.36 |
| IRIS_313-9925 | GCTCAAAGGAGATCG        | ATCGTT         | CAAGCCCAGGACAACTAGG          | 5.45  |
| IRIS_313-9940 | <b>GCTCGCTGGGGGCCG</b> | <b>GCCGGT</b>  | <b>TGGGTCTGTGTTTCGTTGGAA</b> | 8.65  |
| IRIS_313-9944 | GCTCAAAGGAGATCG        | ATCGTT         | -                            | 3.67  |

Table S4

| Accession IDs | New_gene               | LOC_Os05g09520 | LOC_Os05g09530               | PGC   |
|---------------|------------------------|----------------|------------------------------|-------|
| IRIS_313-9953 | GCTCAAAGGAGATCG        | ATCGTT         | TGGGTCTGTATTCGTTGGAA         | 10.01 |
| IRIS_313-9966 | <b>GCTCGCTGGGGGCCG</b> | <b>GCCGGT</b>  | <b>TGGGTCTGTGTTTCGTTGGAA</b> | 6.97  |
| IRIS_313-9968 | ATATGCTAAGAGCTA        | GCTAGG         | -                            | 30.61 |
| IRIS_313-9969 | ATATGCTAAGAGCTA        | GCTAGG         | TGGTTCTGTATTCGTTGGAA         | 90.56 |
| IRIS_313-9970 | ATATGCTAAGAGCTA        | GCTAGG         | CAAGCTCACGACAACTAGG          | 18.53 |
| IRIS_313-9976 | ATTTGCTAAGAGCTA        | GCTAGG         | CAAGCTCACGACAACTAGG          | 29.27 |

**Table S5: Single locus GWAS for SNPs detected against ZS97 reference genome with corresponding orthologous ids in MH63 and Nipponbare.**

| Position | Chr | Ref | Alt | Beta  | -log10 p-value | Region     | Gene                      | Orthologues_MH63          | Orthologues_Nipponbare        |
|----------|-----|-----|-----|-------|----------------|------------|---------------------------|---------------------------|-------------------------------|
| 4104137  | 5   | G   | C   | 0.30  | 5.70           | Upstream   | ZS05g0093300              | MH05g0082900              | LOC_Os05g08670                |
| 4599654  | 5   | T   | A   | -0.41 | 11.70          | Upstream   | ZS05g0110000 (GW5)        | MH05g0093000 (GW5)        | LOC_Os05g09520 (GW5)          |
| 4599671  | 5   | A   | G   | -0.48 | 14.84          | Upstream   | ZS05g0110000              | MH05g0093000              | LOC_Os05g09520                |
| 4600629  | 5   | A   | G   | -0.46 | 11.23          | Upstream   | ZS05g0110000              | MH05g0093000              | LOC_Os05g09520                |
| 4602339  | 5   | G   | T   | -0.45 | 13.14          | Upstream   | ZS05g0110000              | MH05g0093000              | LOC_Os05g09520                |
| 4607243  | 5   | A   | T   | -0.43 | 12.39          | Downstream | ZS05g0110000              | MH05g0093000              | LOC_Os05g09520                |
| 4607689  | 5   | A   | T   | -0.45 | 13.41          | Downstream | ZS05g0110000              | MH05g0093000              | LOC_Os05g09520                |
| 4607936  | 5   | A   | G   | -0.43 | 12.29          | Downstream | ZS05g0110000              | MH05g0093000              | LOC_Os05g09520                |
| 4608886  | 5   | T   | C   | -0.43 | 12.40          | Downstream | ZS05g0110000              | MH05g0093000              | LOC_Os05g09520                |
| 4609180  | 5   | T   | C   | -0.43 | 12.41          | Downstream | ZS05g0110000              | MH05g0093000              | LOC_Os05g09520                |
| 4609667  | 5   | C   | A   | -0.41 | 11.34          | Downstream | ZS05g0110000              | MH05g0093000              | LOC_Os05g09520                |
| 4609747  | 5   | A   | G   | -0.40 | 10.65          | Downstream | ZS05g0110000              | MH05g0093000              | LOC_Os05g09520                |
| 4609824  | 5   | C   | T   | -0.40 | 10.48          | Downstream | ZS05g0110000              | MH05g0093000              | LOC_Os05g09520                |
| 4609854  | 5   | G   | A   | -0.41 | 10.98          | Downstream | ZS05g0110000              | MH05g0093000              | LOC_Os05g09520                |
| 4609910  | 5   | G   | A   | -0.41 | 11.03          | Downstream | ZS05g0110000              | MH05g0093000              | LOC_Os05g09520                |
| 4610087  | 5   | C   | G   | -0.42 | 11.68          | Downstream | ZS05g0110000              | MH05g0093000              | LOC_Os05g09520                |
| 4610188  | 5   | C   | T   | -0.40 | 10.33          | Downstream | ZS05g0110000              | MH05g0093000              | LOC_Os05g09520                |
| 4611979  | 5   | C   | T   | -0.40 | 10.53          | Intergenic | ZS05g0110000-ZS05g0110100 | MH05g0093000-MH05g0093100 | LOC_Os05g09520-LOC_Os05g09530 |
| 4612359  | 5   | C   | T   | -0.40 | 10.33          | Intergenic | ZS05g0110000-ZS05g0110100 | MH05g0093000-MH05g0093100 | LOC_Os05g09520-LOC_Os05g09530 |
| 4613099  | 5   | C   | T   | -0.37 | 8.69           | Intergenic | ZS05g0110000-ZS05g0110100 | MH05g0093000-MH05g0093100 | LOC_Os05g09520-LOC_Os05g09530 |
| 4613339  | 5   | T   | C   | -0.36 | 8.10           | Intergenic | ZS05g0110000-ZS05g0110100 | MH05g0093000-MH05g0093100 | LOC_Os05g09520-LOC_Os05g09530 |
| 4613365  | 5   | T   | C   | -0.35 | 7.67           | Intergenic | ZS05g0110000-ZS05g0110100 | MH05g0093000-MH05g0093100 | LOC_Os05g09520-LOC_Os05g09530 |
| 4613902  | 5   | A   | G   | -0.35 | 7.72           | Intergenic | ZS05g0110000-ZS05g0110100 | MH05g0093000-MH05g0093100 | LOC_Os05g09520-LOC_Os05g09530 |
| 4613924  | 5   | G   | A   | -0.36 | 8.43           | Intergenic | ZS05g0110000-ZS05g0110100 | MH05g0093000-MH05g0093100 | LOC_Os05g09520-LOC_Os05g09530 |
| 4613931  | 5   | G   | A   | -0.34 | 7.44           | Intergenic | ZS05g0110000-ZS05g0110100 | MH05g0093000-MH05g0093100 | LOC_Os05g09520-LOC_Os05g09530 |
| 4613987  | 5   | C   | A   | -0.27 | 5.14           | Intergenic | ZS05g0110000-ZS05g0110100 | MH05g0093000-MH05g0093100 | LOC_Os05g09520-LOC_Os05g09530 |
| 4614060  | 5   | A   | G   | -0.35 | 8.01           | Intergenic | ZS05g0110000-ZS05g0110100 | MH05g0093000-MH05g0093100 | LOC_Os05g09520-LOC_Os05g09530 |
| 4614276  | 5   | G   | A   | -0.34 | 7.48           | Intergenic | ZS05g0110000-ZS05g0110100 | MH05g0093000-MH05g0093100 | LOC_Os05g09520-LOC_Os05g09530 |
| 4614292  | 5   | C   | T   | -0.30 | 6.15           | Intergenic | ZS05g0110000-ZS05g0110100 | MH05g0093000-MH05g0093100 | LOC_Os05g09520-LOC_Os05g09530 |
| 4614299  | 5   | A   | G   | -0.34 | 7.50           | Intergenic | ZS05g0110000-ZS05g0110100 | MH05g0093000-MH05g0093100 | LOC_Os05g09520-LOC_Os05g09530 |
| 4614499  | 5   | T   | C   | -0.29 | 5.99           | Intergenic | ZS05g0110000-ZS05g0110100 | MH05g0093000-MH05g0093100 | LOC_Os05g09520-LOC_Os05g09530 |
| 4614515  | 5   | A   | G   | -0.30 | 6.24           | Intergenic | ZS05g0110000-ZS05g0110100 | MH05g0093000-MH05g0093100 | LOC_Os05g09520-LOC_Os05g09530 |
| 4615150  | 5   | A   | G   | -0.31 | 6.39           | Intergenic | ZS05g0110000-ZS05g0110100 | MH05g0093000-MH05g0093100 | LOC_Os05g09520-LOC_Os05g09530 |
| 4615250  | 5   | T   | A   | -0.37 | 8.88           | Intergenic | ZS05g0110000-ZS05g0110100 | MH05g0093000-MH05g0093100 | LOC_Os05g09520-LOC_Os05g09530 |
| 4615336  | 5   | T   | C   | -0.37 | 8.94           | Intergenic | ZS05g0110000-ZS05g0110100 | MH05g0093000-MH05g0093100 | LOC_Os05g09520-LOC_Os05g09530 |
| 4615445  | 5   | A   | G   | -0.36 | 8.30           | Intergenic | ZS05g0110000-ZS05g0110100 | MH05g0093000-MH05g0093100 | LOC_Os05g09520-LOC_Os05g09530 |
| 4615745  | 5   | A   | G   | -0.37 | 8.74           | Intergenic | ZS05g0110000-ZS05g0110100 | MH05g0093000-MH05g0093100 | LOC_Os05g09520-LOC_Os05g09530 |
| 4616584  | 5   | T   | A   | -0.37 | 8.36           | Intergenic | ZS05g0110000-ZS05g0110100 | MH05g0093000-MH05g0093100 | LOC_Os05g09520-LOC_Os05g09530 |

| Position | Chr | Ref | Alt | Beta  | -log10 p-value | Region     | Gene                      | Orthologues_MH63          | Orthologues_Nipponbare        |
|----------|-----|-----|-----|-------|----------------|------------|---------------------------|---------------------------|-------------------------------|
| 4617119  | 5   | A   | T   | -0.38 | 9.09           | Intergenic | ZS05g0110000-ZS05g0110100 | MH05g0093000-MH05g0093100 | LOC_Os05g09520-LOC_Os05g09530 |
| 5054322  | 5   | A   | C   | -0.31 | 5.27           | Downstream | ZS05g0115200              | MH05g0098900              | LOC_Os05g10690                |
| 5069547  | 5   | T   | C   | -0.27 | 5.16           | Upstream   | ZS05g0115300              | MH05g0099000              | LOC_Os05g10700                |

Table S6

**Table S6: Single locus GWAS for SNPs detected against MH63 reference genome with corresponding Orthologous IDs in ZS97 and Nipponbare**

| Position | Chr | Ref | Alt | Beta  | -log10 p-value | Effect     | Gene         | Orthologous_ZS97 | Orthologous_Nipponbare |
|----------|-----|-----|-----|-------|----------------|------------|--------------|------------------|------------------------|
| 5012096  | 5   | T   | C   | 0.29  | 5.28           | Synonymous | MH05g0089300 | Not present      | LOC_Os05g09200         |
| 5107094  | 5   | A   | G   | 0.35  | 8.16           | Upstream   | MH05g0091600 | ZS05g0108900     | LOC_Os05g09360         |
| 5192872  | 5   | T   | C   | 0.36  | 8.67           | Upstream   | MH05g0092200 | Not present      | LOC_Os05g09470         |
| 5269365  | 5   | T   | C   | -0.32 | 7.30           | Upstream   | MH05g0093300 | ZS05g0110300     | LOC_Os05g09550         |
| 5298677  | 5   | C   | T   | -0.30 | 6.63           | Upstream   | MH05g0094100 | ZS05g0110700     | LOC_Os05g09630         |
| 5302192  | 5   | T   | C   | -0.30 | 6.60           | Upstream   | MH05g0094100 | ZS05g0110700     | LOC_Os05g09630         |

Table S7

**Table S7: Genes/QTLs characterized in the mutants influencing the grain chalkiness.**

| Gene/QTL                                        | Chr | Locus ID       | Start-end positions (Mb) | Effect                                                   | Reference                                                  |
|-------------------------------------------------|-----|----------------|--------------------------|----------------------------------------------------------|------------------------------------------------------------|
| <i>SUBSTANDARD STARCH GRAIN4 (SSG4)</i>         | 1   | LOC_Os01g08420 | 4.13-4.14                | Chalk endosperm                                          | (Matsushima <i>et al.</i> , 2014)                          |
| <i>OsAPL2</i>                                   | 1   | LOC_Os01g44220 | 25.35-25.36              | Chalky endosperm                                         | (Zhang <i>et al.</i> , 2012)                               |
| <i>SBEIIB</i>                                   | 2   | LOC_Os02g32660 | 19.37-19.36              | Amylose-Extender Mutation in Rice                        | (Butardo <i>et al.</i> , 2011; Nishi <i>et al.</i> , 2001) |
| <i>gif1 (grain incomplete Filling 1)/OsCIN2</i> | 4   | LOC_Os04g33740 | 20.42-20.43              | Abnormally developed and loosely Packed starch granules  | (Wang <i>et al.</i> , 2008)                                |
| <i>flo2 (FLOURY ENDOSPERM2)</i>                 | 4   | LOC_Os04g55230 | 32.84-32.85              | Affects storage substance accumulation In the endosperm  | (She <i>et al.</i> , 2010)                                 |
| <i>Flo4 (OsPPDKB)</i>                           | 5   | LOC_Os05g33570 | 19.72-19.74              | Affects metabolism and starch structure In the endosperm | (Kang <i>et al.</i> , 2005; Zhang <i>et al.</i> , 2018)    |
| <i>Flo1</i>                                     | 5   | NA*            | 17.70-20.70              | floury endosperm                                         | (Mo <i>et al.</i> , 2013a)                                 |
| <i>flo7 (t)</i>                                 | 5   | NA*            | 19.33-19.86              | white-core floury endosperm                              | (Mo <i>et al.</i> , 2013b)                                 |
| <i>OsSSIII/flo5</i>                             | 8   | LOC_Os08g09230 | 5.35-5.36                | white-core floury endosperm                              | (Fujita <i>et al.</i> , 2007; Ryoo <i>et al.</i> , 2007)   |
| <i>OsVPS22</i>                                  | 9   | LOC_Os09g36020 | 20.75-20.75              | chalky endosperm                                         | (Zhang <i>et al.</i> , 2013)                               |
| <i>Flo7 (FLOURY ENDOSPERM7)</i>                 | 10  | LOC_Os10g32680 | 17.11-17.12              | chalky or floury endosperm                               | (Zhang <i>et al.</i> , 2015)                               |

\*The gene ID was not detected.

#### References :

Butardo V, Jr., Fitzgerald MA, Bird AR, Gidley MJ, Flanagan BM, Larroque O, Resurreccion AP, Laidlaw HK, Jobling SA, Morell MK, Rahman S 2011. Impact of down-regulation of starch branching enzyme IIb in rice by artificial microRNA- and hairpin RNA-mediated RNA silencing. *Journal of Experimental Botany* **62**, 4927-4941.

Fujita N, Yoshida M, Kondo T, Saito K, Utsumi Y, Tokunaga T, Nishi A, Satoh H, Park J-H, Jane J-L 2007. Characterization of SSIIIa-deficient mutants of rice: the function of SSIIIa and pleiotropic effects by SSIIIa deficiency in the rice endosperm. *Plant Physiology* **144**, 2009-2023.



## Table S7

- Kang HG, Park S, Matsuoka M, An G.** 2005. White-core endosperm floury endosperm-4 in rice is generated by knockout mutations in the C4-type pyruvate orthophosphate dikinase gene (OsPPDKB). *The Plant Journal* **42**, 901-911.
- Matsushima R, Maekawa M, Kusano M, Kondo H, Fujita N, Kawagoe Y, Sakamoto W.** 2014. Amyloplast-localized SUBSTANDARD STARCH GRAIN4 protein influences the size of starch grains in rice endosperm. *Plant Physiology* **164**, 623-636.
- Mo Y-J, Jeung J-U, Kang K-H, Lee J-S, Kim B-K.** 2013a. Genetic Analysis on Floury Endosperm Characteristics of Namil (SA)-flo1, a Japonica Rice Mutant Line. *Korean Journal of Crop Science* **58**, 283-291.
- Mo Y-J, Jeung J-U, Shin Y-S, Park CS, Kang K-H, Kim B-K.** 2013b. Agronomic and genetic analysis of Suweon 542, a rice floury mutant line suitable for dry milling. *Rice* **6**, 37.
- Nishi A, Nakamura Y, Tanaka N, Satoh H.** 2001. Biochemical and genetic analysis of the effects of amylose -extender mutation in rice endosperm. *Plant Physiology* **127**, 459-472.
- Ryoo N, Yu C, Park C-S, Baik M-Y, Park IM, Cho M-H, Bhoo SH, An G, Hahn T-R, Jeon J-S.** 2007. Knockout of a starch synthase gene OsSSIIIa/Flo5 causes white-core floury endosperm in rice (*Oryza sativa* L.). *Plant Cell Reports* **26**, 1083-1095.
- She K-C, Kusano H, Koizumi K, Yamakawa H, Hakata M, Imamura T, Fukuda M, Naito N, Tsurumaki Y, Yaeshima M.** 2010. A novel factor FLOURY ENDOSPERM2 is involved in regulation of rice grain size and starch quality. *The Plant Cell*, tpc. 109.070821.
- Wang E, Wang J, Zhu X, Hao W, Wang L, Li Q, Zhang L, He W, Lu B, Lin H.** 2008. Control of rice Grain-filling and yield by a gene with a potential signature of domestication. *Nature Genetics* **40**, 1370.
